# Supplementary material for: Exact Methods and a Two-Stage Iterative Heuristic for the Carrier-Vehicle Traveling Salesman Problem
Source: Atypon-hosted journal article supplement (doi:10.1287/ijoc.2025.1140), 2025-10-27
Supplement: ijoc.2025.1140.cd.zip [file Total_Results_each_instance.pdf › 2025.1140-main/Total_Results_each_instance.pdf]

## 1. Detailed Comparison Results on Gam72 and Erd132

We next detail the comparison results for instances in sets Gam72 and Erd132. The results obtained by RBA, G2018, E2021, Model+, and LBBD are reported in Tables 1–4. The results obtained by ILS and TSIH are reported in Tables 5–7. The instance name “SD11-1” represents the first of the three instances from the set SD with 10 targets. In Tables 1–4, the number in “<sup>( $\cdot$ )</sup>” represents the optimality solutions number found by E2021, Model+ or LBBD. In Tables 5–7, the number in “<sup>( $\cdot$ )</sup>” denotes the number of instances where the best known solutions (BKS) were found, i.e,  $UB = BKS, \Delta = 0$ .

## 2. Results of Model+, LBBD and TSIH in instance set Poi325

We then detail the results for instances in set Poi325. We provide the results obtained by Model+, LBBD and TSIH, as shown in Tables 8–14.

**Table 1 Comparison results of exact methods for SD instances**

|        | Gambella      |               |               |                | Erdogan       |                            |               | this paper    |                            |                |               |                            |                |
|--------|---------------|---------------|---------------|----------------|---------------|----------------------------|---------------|---------------|----------------------------|----------------|---------------|----------------------------|----------------|
|        | RBA           |               | G2018         |                | E2021         |                            |               | Model+        |                            |                | LBBB          |                            |                |
|        | UB            | time          | UB            | time           | UB            | gap(%)                     | time          | UB            | gap(%)                     | time           | UB            | gap(%)                     | time           |
| SD11-1 | 108.76        | 2.52          | 108.76        | 1.96           | 108.76        | 0.00                       | 17.06         | 108.76        | 0.00                       | 6.22           | 108.76        | 0.00                       | 1.00           |
| SD11-2 | 113.92        | 15.19         | 113.92        | 8.62           | 113.92        | 0.00                       | 68.36         | 113.92        | 0.00                       | 30.13          | 113.92        | 0.00                       | 13.66          |
| SD11-3 | 125.19        | 3.29          | 125.19        | 1.93           | 125.19        | 0.00                       | 15.16         | 125.19        | 0.00                       | 5.38           | 125.19        | 0.00                       | 0.92           |
| SD12-1 | 107.60        | 2.96          | 107.60        | 2.28           | 107.60        | 0.00                       | 12.47         | 107.60        | 0.00                       | 3.61           | 107.60        | 0.00                       | 0.64           |
| SD12-2 | 153.94        | 2.24          | 153.94        | 1.96           | 153.94        | 0.00                       | 23.67         | 153.94        | 0.00                       | 4.00           | 153.94        | 0.00                       | 0.56           |
| SD12-3 | 118.61        | 12.08         | 118.61        | 8.76           | 118.61        | 0.00                       | 22.56         | 118.61        | 0.00                       | 18.64          | 118.61        | 0.00                       | 3.38           |
| SD13-1 | 116.12        | 4.33          | 116.12        | 4.12           | 116.12        | 0.00                       | 22.84         | 116.12        | 0.00                       | 4.98           | 116.12        | 0.00                       | 0.84           |
| SD13-2 | 136.86        | 211.11        | 136.86        | 137.52         | 136.86        | 0.00                       | 919.78        | 136.86        | 0.00                       | 161.64         | 136.86        | 0.00                       | 230.20         |
| SD13-3 | 121.47        | 13.78         | 121.47        | 13.11          | 121.47        | 0.00                       | 36.53         | 121.47        | 0.00                       | 9.84           | 121.47        | 0.00                       | 3.44           |
| SD14-1 | 128.14        | 199.36        | 128.14        | 201.05         | 128.14        | 0.00                       | 128.36        | 128.14        | 0.00                       | 63.00          | 128.14        | 0.00                       | 49.81          |
| SD14-2 | 124.66        | 123.07        | 124.66        | 152.53         | 124.66        | 0.00                       | 134.48        | 124.66        | 0.00                       | 69.20          | 124.66        | 0.00                       | 45.50          |
| SD14-3 | 138.07        | 56.12         | 138.07        | 103.62         | 138.07        | 0.00                       | 69.44         | 138.07        | 0.00                       | 25.00          | 138.07        | 0.00                       | 6.81           |
| SD15-1 | 123.67        | 277.22        | 123.67        | 403.20         | 123.67        | 0.00                       | 240.83        | 123.67        | 0.00                       | 91.36          | 123.67        | 0.00                       | 59.50          |
| SD15-2 | 136.10        | 259.27        | 136.10        | 643.02         | 136.10        | 0.00                       | 436.47        | 136.10        | 0.00                       | 42.63          | 136.10        | 0.00                       | 17.39          |
| SD15-3 | 132.72        | 3600.00       | 132.72        | 3600.00        | 132.72        | 10.82                      | 3600.00       | 132.72        | 0.00                       | 1887.69        | 132.72        | 8.40                       | 3600.00        |
| SD16-1 | 145.10        | 673.47        | 145.10        | 3600.00        | 145.10        | 0.00                       | 346.86        | 145.10        | 0.00                       | 179.02         | 145.10        | 0.00                       | 50.36          |
| SD16-2 | 155.36        | 2837.70       | 155.36        | 3600.00        | 155.36        | 0.00                       | 2228.28       | 155.36        | 0.00                       | 455.53         | 155.36        | 0.00                       | 903.63         |
| SD16-3 | 128.38        | 3600.00       | 128.38        | 3600.00        | 128.38        | 0.00                       | 2060.22       | 128.38        | 0.00                       | 561.97         | 128.38        | 0.00                       | 1261.41        |
|        | <b>128.59</b> | <b>660.77</b> | <b>128.59</b> | <b>893.54</b>  | <b>128.59</b> | <b>0.60<sup>(17)</sup></b> | <b>576.86</b> | <b>128.59</b> | <b>0.00<sup>(18)</sup></b> | <b>201.10</b>  | <b>128.59</b> | <b>0.47<sup>(17)</sup></b> | <b>347.17</b>  |
| SD17-1 | —             | —             | 295.33        | 7200.00        | 285.58        | 0.00                       | 36.98         | 285.58        | 0.00                       | 12.98          | 285.58        | 0.00                       | 1.84           |
| SD17-2 | —             | —             | 357.74        | 7200.00        | 341.49        | 0.00                       | 190.38        | 341.49        | 0.00                       | 55.03          | 341.49        | 0.00                       | 9.61           |
| SD17-3 | —             | —             | 286.28        | 7200.00        | 270.31        | 0.00                       | 107.42        | 270.31        | 0.00                       | 41.64          | 270.31        | 0.00                       | 14.08          |
| SD18-1 | —             | —             | 351.79        | 7200.00        | 329.47        | 0.00                       | 104.69        | 329.47        | 0.00                       | 39.52          | 329.47        | 0.00                       | 7.53           |
| SD18-2 | —             | —             | 338.97        | 7200.00        | 314.49        | 0.00                       | 58.15         | 314.49        | 0.00                       | 54.31          | 314.49        | 0.00                       | 5.80           |
| SD18-3 | —             | —             | 381.83        | 7200.00        | 341.80        | 0.00                       | 262.13        | 341.80        | 0.00                       | 134.28         | 341.80        | 0.00                       | 33.41          |
| SD19-1 | —             | —             | 390.30        | 7200.00        | 359.70        | 0.00                       | 1327.38       | 359.70        | 0.00                       | 992.50         | 359.70        | 0.00                       | 4154.06        |
| SD19-2 | —             | —             | 372.80        | 7200.00        | 312.15        | 0.00                       | 51.94         | 312.15        | 0.00                       | 17.95          | 312.15        | 0.00                       | 0.95           |
| SD19-3 | —             | —             | 388.31        | 7200.00        | 379.31        | 0.00                       | 429.47        | 379.31        | 0.00                       | 515.47         | 379.31        | 0.00                       | 297.19         |
| SD20-1 | —             | —             | 396.96        | 7200.00        | 365.93        | 0.00                       | 2317.80       | 365.93        | 0.00                       | 772.59         | 365.93        | 0.00                       | 630.61         |
| SD20-2 | —             | —             | 366.12        | 7200.00        | 355.71        | 0.00                       | 2857.17       | 355.71        | 0.00                       | 587.67         | 355.71        | 0.00                       | 2363.00        |
| SD20-3 | —             | —             | 431.74        | 7200.00        | 341.76        | 0.00                       | 403.03        | 341.76        | 0.00                       | 169.92         | 341.76        | 0.00                       | 44.11          |
| SD21-1 | —             | —             | 434.67        | 7200.00        | 371.82        | 0.00                       | 78.72         | 371.82        | 0.00                       | 36.59          | 371.82        | 0.00                       | 9.73           |
| SD21-2 | —             | —             | 419.55        | 7200.00        | 373.80        | 0.00                       | 2723.54       | 373.80        | 0.00                       | 562.63         | 373.80        | 0.00                       | 360.39         |
| SD21-3 | —             | —             | 350.28        | 7200.00        | 350.28        | 0.00                       | 3850.27       | 350.28        | 0.00                       | 1415.00        | 350.28        | 0.00                       | 2227.70        |
|        | <b>—</b>      | <b>—</b>      | <b>370.84</b> | <b>7200.00</b> | <b>339.57</b> | <b>0.00<sup>(15)</sup></b> | <b>986.60</b> | <b>339.57</b> | <b>0.00<sup>(15)</sup></b> | <b>360.54</b>  | <b>360.54</b> | <b>0.00<sup>(15)</sup></b> | <b>677.33</b>  |
| SD26-1 | —             | —             | —             | —              | —             | —                          | —             | 393.55        | 5.87                       | 7200.00        | 393.55        | 7.29                       | 7200.00        |
| SD26-2 | —             | —             | —             | —              | —             | —                          | —             | 413.12        | 6.48                       | 7200.00        | 413.12        | 1.68                       | 7200.00        |
| SD26-3 | —             | —             | —             | —              | —             | —                          | —             | 377.82        | 8.56                       | 7200.00        | 377.82        | 10.52                      | 7200.00        |
| SD31-1 | —             | —             | —             | —              | —             | —                          | —             | 406.69        | 24.90                      | 7200.00        | 406.69        | 16.25                      | 7200.00        |
| SD31-2 | —             | —             | —             | —              | —             | —                          | —             | 348.83        | 20.62                      | 7200.00        | 348.83        | 19.97                      | 7200.00        |
| SD31-3 | —             | —             | —             | —              | —             | —                          | —             | 388.68        | 8.80                       | 7200.00        | 388.68        | 9.12                       | 7200.00        |
| SD36-1 | —             | —             | —             | —              | —             | —                          | —             | 477.51        | 17.30                      | 7200.00        | 477.51        | 16.71                      | 7200.00        |
| SD36-2 | —             | —             | —             | —              | —             | —                          | —             | 412.96        | 18.26                      | 7200.00        | 412.96        | 17.27                      | 7200.00        |
| SD36-3 | —             | —             | —             | —              | —             | —                          | —             | 384.90        | 22.25                      | 7200.00        | 384.89        | 20.57                      | 7200.00        |
| SD41-1 | —             | —             | —             | —              | —             | —                          | —             | 478.33        | 18.50                      | 7200.00        | 478.33        | 18.05                      | 7200.00        |
| SD41-2 | —             | —             | —             | —              | —             | —                          | —             | 452.43        | 24.04                      | 7200.00        | 452.43        | 23.45                      | 7200.00        |
| SD41-3 | —             | —             | —             | —              | —             | —                          | —             | 452.86        | 18.21                      | 7200.00        | 452.86        | 17.55                      | 7200.00        |
| SD46-1 | —             | —             | —             | —              | —             | —                          | —             | 504.48        | 18.37                      | 7200.00        | 504.48        | 17.39                      | 7200.00        |
| SD46-2 | —             | —             | —             | —              | —             | —                          | —             | 416.15        | 24.57                      | 7200.00        | 416.15        | 23.73                      | 7200.00        |
| SD46-3 | —             | —             | —             | —              | —             | —                          | —             | 506.14        | 18.32                      | 7200.00        | 506.14        | 17.26                      | 7200.00        |
| SD51-1 | —             | —             | —             | —              | —             | —                          | —             | 448.45        | 27.87                      | 7200.00        | 448.45        | 25.87                      | 7200.00        |
| SD51-2 | —             | —             | —             | —              | —             | —                          | —             | 445.98        | 40.80                      | 7200.00        | 445.98        | 35.83                      | 7200.00        |
| SD51-3 | —             | —             | —             | —              | —             | —                          | —             | 508.49        | 22.67                      | 7200.00        | 508.49        | 21.93                      | 7200.00        |
|        | <b>—</b>      | <b>—</b>      | <b>—</b>      | <b>—</b>       | <b>—</b>      | <b>—</b>                   | <b>—</b>      | <b>434.30</b> | <b>19.24<sup>(9)</sup></b> | <b>7200.00</b> | <b>434.30</b> | <b>17.80<sup>(9)</sup></b> | <b>7200.00</b> |

**Table 2 Comparison results of exact methods for MD instances**

|        | Gambella      |               |               |                | Erdogan       |                            |               | this paper    |                            |                |               |                            |                |
|--------|---------------|---------------|---------------|----------------|---------------|----------------------------|---------------|---------------|----------------------------|----------------|---------------|----------------------------|----------------|
|        | RBA           |               | G2018         |                | E2021         |                            |               | Model+        |                            |                | LBBB          |                            |                |
|        | UB            | time          | UB            | time           | UB            | gap(%)                     | time          | UB            | gap(%)                     | time           | UB            | gap(%)                     | time           |
| MD11-1 | 146.85        | 0.31          | 146.85        | 0.19           | 146.85        | 0.00                       | 5.28          | 146.85        | 0.00                       | 1.22           | 146.85        | 0.00                       | 0.13           |
| MD11-2 | 132.12        | 0.65          | 132.12        | 0.60           | 132.12        | 0.00                       | 9.53          | 132.12        | 0.00                       | 2.47           | 132.12        | 0.00                       | 0.23           |
| MD11-3 | 133.42        | 1.11          | 133.42        | 0.76           | 133.42        | 0.00                       | 10.86         | 133.42        | 0.00                       | 1.69           | 133.42        | 0.00                       | 0.20           |
| MD12-1 | 157.74        | 2.44          | 157.74        | 2.15           | 157.74        | 0.00                       | 15.86         | 157.74        | 0.00                       | 5.72           | 157.74        | 0.00                       | 0.48           |
| MD12-2 | 165.63        | 2.44          | 165.63        | 1.98           | 165.63        | 0.00                       | 23.69         | 165.63        | 0.00                       | 3.91           | 165.63        | 0.00                       | 0.38           |
| MD12-3 | 121.24        | 2.05          | 121.24        | 1.58           | 121.24        | 0.00                       | 19.03         | 121.24        | 0.00                       | 5.17           | 121.24        | 0.00                       | 0.33           |
| MD13-1 | 150.89        | 12.68         | 150.89        | 15.25          | 150.89        | 0.00                       | 63.75         | 150.89        | 0.00                       | 14.03          | 150.89        | 0.00                       | 2.88           |
| MD13-2 | 130.99        | 14.32         | 130.99        | 16.92          | 130.99        | 0.00                       | 42.75         | 130.99        | 0.00                       | 7.89           | 130.99        | 0.00                       | 1.89           |
| MD13-3 | 150.37        | 10.28         | 150.37        | 12.72          | 150.37        | 0.00                       | 29.38         | 150.37        | 0.00                       | 6.61           | 150.37        | 0.00                       | 1.05           |
| MD14-1 | 146.95        | 20.23         | 146.95        | 24.23          | 146.95        | 0.00                       | 65.61         | 146.95        | 0.00                       | 14.19          | 146.95        | 0.00                       | 2.81           |
| MD14-2 | 163.59        | 36.10         | 163.59        | 54.06          | 163.59        | 0.00                       | 83.95         | 163.59        | 0.00                       | 15.53          | 163.59        | 0.00                       | 7.91           |
| MD14-3 | 153.01        | 24.68         | 153.01        | 38.34          | 153.01        | 0.00                       | 44.95         | 153.01        | 0.00                       | 14.95          | 153.01        | 0.00                       | 1.81           |
| MD15-1 | 168.24        | 1468.48       | 168.24        | 1476.65        | 168.24        | 0.00                       | 789.94        | 168.24        | 0.00                       | 439.64         | 168.24        | 0.00                       | 276.50         |
| MD15-2 | 136.94        | 478.55        | 136.94        | 1277.98        | 136.94        | 0.00                       | 234.95        | 136.94        | 0.00                       | 58.45          | 136.94        | 0.00                       | 34.89          |
| MD15-3 | 157.86        | 413.02        | 157.86        | 624.48         | 157.86        | 0.00                       | 656.53        | 157.86        | 0.00                       | 97.78          | 157.86        | 0.00                       | 53.70          |
| MD16-1 | 166.21        | 3600.00       | 166.21        | 3600.00        | 166.21        | 0.00                       | 1716.09       | 166.21        | 0.00                       | 295.80         | 166.21        | 0.00                       | 579.02         |
| MD16-2 | 177.23        | 1176.74       | 177.23        | 3232.90        | 177.23        | 0.00                       | 420.25        | 177.23        | 0.00                       | 77.64          | 177.23        | 0.00                       | 19.59          |
| MD16-3 | 164.37        | 2661.46       | 164.37        | 3600.00        | 164.37        | 0.00                       | 198.94        | 164.37        | 0.00                       | 73.23          | 164.37        | 0.00                       | 43.72          |
|        | <b>151.31</b> | <b>551.42</b> | <b>151.31</b> | <b>776.67</b>  | <b>151.31</b> | <b>0.00<sup>(18)</sup></b> | <b>246.19</b> | <b>151.31</b> | <b>0.00<sup>(18)</sup></b> | <b>63.11</b>   | <b>151.31</b> | <b>0.00<sup>(18)</sup></b> | <b>57.08</b>   |
| MD17-1 | —             | —             | 340.54        | 7200.00        | 322.21        | 0.00                       | 44.80         | 322.21        | 0.00                       | 9.06           | 322.21        | 0.00                       | 1.56           |
| MD17-2 | —             | —             | 375.15        | 7200.00        | 350.08        | 0.00                       | 91.71         | 350.08        | 0.00                       | 207.06         | 350.08        | 0.00                       | 55.03          |
| MD17-3 | —             | —             | 405.54        | 7200.00        | 356.27        | 0.00                       | 33.61         | 356.27        | 0.00                       | 8.14           | 356.27        | 0.00                       | 0.91           |
| MD18-1 | —             | —             | 379.83        | 7200.00        | 346.43        | 0.00                       | 122.22        | 346.43        | 0.00                       | 37.06          | 346.43        | 0.00                       | 5.03           |
| MD18-2 | —             | —             | 341.80        | 7200.00        | 335.27        | 0.00                       | 60.85         | 335.27        | 0.00                       | 141.84         | 335.27        | 0.00                       | 20.69          |
| MD18-3 | —             | —             | 439.54        | 7200.00        | 376.27        | 0.00                       | 107.19        | 376.28        | 0.00                       | 21.00          | 376.28        | 0.00                       | 1.73           |
| MD19-1 | —             | —             | 426.68        | 7200.00        | 364.45        | 0.00                       | 157.89        | 364.45        | 0.00                       | 146.59         | 364.45        | 0.00                       | 23.56          |
| MD19-2 | —             | —             | 424.95        | 7200.00        | 370.01        | 0.00                       | 119.73        | 370.01        | 0.00                       | 64.64          | 370.01        | 0.00                       | 13.42          |
| MD19-3 | —             | —             | 424.84        | 7200.00        | 345.01        | 0.00                       | 82.63         | 345.01        | 0.00                       | 41.38          | 345.01        | 0.00                       | 13.89          |
| MD20-1 | —             | —             | 421.84        | 7200.00        | 341.91        | 0.00                       | 249.25        | 341.91        | 0.00                       | 111.34         | 341.91        | 0.00                       | 40.67          |
| MD20-2 | —             | —             | 359.41        | 7200.00        | 332.47        | 0.00                       | 676.15        | 332.47        | 0.00                       | 260.63         | 332.47        | 0.00                       | 205.66         |
| MD20-3 | —             | —             | 399.58        | 7200.00        | 342.91        | 0.00                       | 128.94        | 342.91        | 0.00                       | 49.17          | 342.91        | 0.00                       | 9.08           |
| MD21-1 | —             | —             | 451.89        | 7200.00        | 363.66        | 0.00                       | 792.71        | 363.66        | 0.00                       | 563.73         | 363.66        | 0.00                       | 1308.12        |
| MD21-2 | —             | —             | 418.01        | 7200.00        | 344.70        | 0.00                       | 463.34        | 344.70        | 0.00                       | 183.67         | 344.70        | 0.00                       | 76.67          |
| MD21-3 | —             | —             | 455.66        | 7200.00        | 363.71        | 0.00                       | 442.70        | 363.71        | 0.00                       | 205.69         | 363.71        | 0.00                       | 265.84         |
|        | <b>—</b>      | <b>—</b>      | <b>404.35</b> | <b>7200.00</b> | <b>350.36</b> | <b>0.00<sup>(15)</sup></b> | <b>238.25</b> | <b>350.36</b> | <b>0.00<sup>(15)</sup></b> | <b>136.73</b>  | <b>350.36</b> | <b>0.00<sup>(15)</sup></b> | <b>136.12</b>  |
| MD26-1 | —             | —             | —             | —              | —             | —                          | —             | 345.22        | 0.00                       | 860.00         | 345.22        | 0.00                       | 4964.52        |
| MD26-2 | —             | —             | —             | —              | —             | —                          | —             | 416.73        | 8.01                       | 7200.00        | 416.73        | 9.24                       | 7200.00        |
| MD26-3 | —             | —             | —             | —              | —             | —                          | —             | 412.09        | 1.83                       | 7200.00        | 412.09        | 6.26                       | 7200.00        |
| MD31-1 | —             | —             | —             | —              | —             | —                          | —             | 424.24        | 9.33                       | 7200.00        | 424.24        | 9.24                       | 7200.00        |
| MD31-2 | —             | —             | —             | —              | —             | —                          | —             | 413.47        | 11.37                      | 7200.00        | 413.47        | 14.99                      | 7200.00        |
| MD31-3 | —             | —             | —             | —              | —             | —                          | —             | 473.10        | 7.84                       | 7200.00        | 473.10        | 8.72                       | 7200.00        |
| MD36-1 | —             | —             | —             | —              | —             | —                          | —             | 426.02        | 12.44                      | 7200.00        | 426.02        | 13.13                      | 7200.00        |
| MD36-2 | —             | —             | —             | —              | —             | —                          | —             | 419.85        | 13.91                      | 7200.00        | 419.85        | 13.83                      | 7200.00        |
| MD36-3 | —             | —             | —             | —              | —             | —                          | —             | 368.41        | 23.59                      | 7200.00        | 368.41        | 19.36                      | 7200.00        |
| MD41-1 | —             | —             | —             | —              | —             | —                          | —             | 447.81        | 18.75                      | 7200.00        | 447.81        | 18.97                      | 7200.00        |
| MD41-2 | —             | —             | —             | —              | —             | —                          | —             | 427.43        | 19.63                      | 7200.00        | 427.43        | 20.25                      | 7200.00        |
| MD41-3 | —             | —             | —             | —              | —             | —                          | —             | 472.19        | 21.18                      | 7200.00        | 472.19        | 17.22                      | 7200.00        |
| MD46-1 | —             | —             | —             | —              | —             | —                          | —             | 470.28        | 24.07                      | 7200.00        | 470.28        | 21.18                      | 7200.00        |
| MD46-2 | —             | —             | —             | —              | —             | —                          | —             | 481.06        | 23.70                      | 7200.00        | 481.06        | 22.50                      | 7200.00        |
| MD46-3 | —             | —             | —             | —              | —             | —                          | —             | 526.81        | 20.80                      | 7200.00        | 526.81        | 18.77                      | 7200.00        |
| MD51-1 | —             | —             | —             | —              | —             | —                          | —             | 467.44        | 24.05                      | 7200.00        | 467.44        | 23.38                      | 7200.00        |
| MD51-2 | —             | —             | —             | —              | —             | —                          | —             | 493.47        | 19.50                      | 7200.00        | 493.47        | 19.60                      | 7200.00        |
| MD51-3 | —             | —             | —             | —              | —             | —                          | —             | 504.62        | 23.41                      | 7200.00        | 504.62        | 20.21                      | 7200.00        |
|        | <b>—</b>      | <b>—</b>      | <b>—</b>      | <b>—</b>       | <b>—</b>      | <b>—</b>                   | <b>—</b>      | <b>443.90</b> | <b>15.74<sup>(1)</sup></b> | <b>6847.78</b> | <b>443.90</b> | <b>15.38<sup>(1)</sup></b> | <b>7075.81</b> |

**Table 3 Comparison results of exact methods for LD instances**

|        | Gambella      |              |               |                | Erdogan       |                            |               | this paper    |                            |                |               |                            |                |
|--------|---------------|--------------|---------------|----------------|---------------|----------------------------|---------------|---------------|----------------------------|----------------|---------------|----------------------------|----------------|
|        | RBA           |              | G2018         |                | E2021         |                            |               | Model+        |                            |                | LBBB          |                            |                |
|        | UB            | time         | UB            | time           | UB            | gap(%)                     | time          | UB            | gap(%)                     | time           | UB            | gap(%)                     | time           |
| LD11-1 | 311.55        | 0.08         | 311.55        | 0.06           | 311.55        | 0.00                       | 2.45          | 311.55        | 0.00                       | 0.45           | 311.55        | 0.00                       | 0.00           |
| LD11-2 | 345.19        | 0.34         | 345.19        | 0.23           | 345.19        | 0.00                       | 3.84          | 345.19        | 0.00                       | 0.47           | 345.19        | 0.00                       | 0.03           |
| LD11-3 | 299.53        | 0.41         | 299.53        | 0.21           | 299.53        | 0.00                       | 4.52          | 299.53        | 0.00                       | 0.47           | 299.53        | 0.00                       | 0.03           |
| LD12-1 | 296.07        | 0.25         | 296.07        | 0.29           | 296.07        | 0.00                       | 4.77          | 296.07        | 0.00                       | 0.86           | 296.07        | 0.00                       | 0.06           |
| LD12-2 | 308.26        | 0.85         | 308.26        | 0.69           | 308.26        | 0.00                       | 6.53          | 308.26        | 0.00                       | 1.25           | 308.26        | 0.00                       | 0.17           |
| LD12-3 | 270.31        | 0.22         | 270.31        | 0.16           | 270.31        | 0.00                       | 3.67          | 270.31        | 0.00                       | 0.86           | 270.31        | 0.00                       | 0.00           |
| LD13-1 | 261.64        | 1.33         | 261.64        | 1.43           | 261.64        | 0.00                       | 10.98         | 261.64        | 0.00                       | 2.91           | 261.64        | 0.00                       | 0.16           |
| LD13-2 | 294.85        | 2.15         | 294.85        | 2.16           | 294.85        | 0.00                       | 8.69          | 294.85        | 0.00                       | 2.67           | 294.85        | 0.00                       | 0.19           |
| LD13-3 | 307.34        | 1.36         | 307.34        | 2.39           | 307.34        | 0.00                       | 7.64          | 307.34        | 0.00                       | 2.17           | 307.34        | 0.00                       | 0.27           |
| LD14-1 | 319.80        | 4.29         | 319.80        | 5.84           | 319.80        | 0.00                       | 7.94          | 319.80        | 0.00                       | 1.59           | 319.80        | 0.00                       | 0.14           |
| LD14-2 | 282.91        | 17.3         | 282.91        | 23.94          | 282.91        | 0.00                       | 28.98         | 282.91        | 0.00                       | 18.48          | 282.91        | 0.00                       | 1.58           |
| LD14-3 | 301.60        | 2.93         | 301.60        | 5.35           | 301.60        | 0.00                       | 8.42          | 301.60        | 0.00                       | 2.88           | 301.60        | 0.00                       | 0.31           |
| LD15-1 | 299.04        | 28.3         | 299.04        | 45.95          | 299.04        | 0.00                       | 28.67         | 299.04        | 0.00                       | 4.67           | 299.04        | 0.00                       | 0.53           |
| LD15-2 | 314.01        | 20.97        | 314.01        | 160.90         | 314.01        | 0.00                       | 25.47         | 314.01        | 0.00                       | 19.47          | 314.01        | 0.00                       | 0.81           |
| LD15-3 | 324.79        | 152.35       | 324.79        | 440.25         | 324.79        | 0.00                       | 74.16         | 324.79        | 0.00                       | 15.81          | 324.79        | 0.00                       | 9.22           |
| LD16-1 | 322.05        | 43.64        | 322.05        | 350.77         | 322.05        | 0.00                       | 13.53         | 322.05        | 0.00                       | 5.14           | 322.05        | 0.00                       | 0.23           |
| LD16-2 | 338.70        | 104.96       | 338.70        | 2726.22        | 338.70        | 0.00                       | 75.34         | 338.70        | 0.00                       | 22.20          | 338.70        | 0.00                       | 5.20           |
| LD16-3 | 353.87        | 1024.65      | 353.87        | 2403.94        | 353.87        | 0.00                       | 35.42         | 353.87        | 0.00                       | 17.56          | 353.87        | 0.00                       | 5.50           |
|        | <b>308.42</b> | <b>78.13</b> | <b>308.42</b> | <b>342.82</b>  | <b>308.42</b> | <b>0.00<sup>(18)</sup></b> | <b>19.50</b>  | <b>308.42</b> | <b>0.00<sup>(18)</sup></b> | <b>6.66</b>    | <b>308.42</b> | <b>0.00<sup>(18)</sup></b> | <b>1.36</b>    |
| LD17-1 | —             | —            | 391.63        | 7200.00        | 380.11        | 0.00                       | 125.73        | 380.11        | 0.00                       | 149.48         | 380.11        | 0.00                       | 24.47          |
| LD17-2 | —             | —            | 358.52        | 7200.00        | 323.68        | 0.00                       | 46.76         | 323.68        | 0.00                       | 22.19          | 323.68        | 0.00                       | 5.06           |
| LD17-3 | —             | —            | 391.46        | 7200.00        | 349.20        | 0.00                       | 56.40         | 349.20        | 0.00                       | 91.81          | 349.20        | 0.00                       | 5.91           |
| LD18-1 | —             | —            | 394.76        | 7200.00        | 329.43        | 0.00                       | 27.52         | 329.43        | 0.00                       | 7.63           | 329.43        | 0.00                       | 2.05           |
| LD18-2 | —             | —            | 342.50        | 7200.00        | 287.78        | 0.00                       | 92.67         | 287.78        | 0.00                       | 14.23          | 287.78        | 0.00                       | 7.38           |
| LD18-3 | —             | —            | 389.83        | 7200.00        | 368.89        | 0.00                       | 160.26        | 368.89        | 0.00                       | 45.70          | 368.89        | 0.00                       | 10.69          |
| LD19-1 | —             | —            | 348.81        | 7200.00        | 313.50        | 0.00                       | 520.81        | 313.50        | 0.00                       | 62.36          | 313.50        | 0.00                       | 48.78          |
| LD19-2 | —             | —            | 384.38        | 7200.00        | 359.53        | 0.00                       | 141.38        | 359.53        | 0.00                       | 31.19          | 359.53        | 0.00                       | 7.64           |
| LD19-3 | —             | —            | 338.75        | 7200.00        | 323.57        | 0.00                       | 647.55        | 323.57        | 0.00                       | 185.92         | 323.57        | 0.00                       | 74.08          |
| LD20-1 | —             | —            | 407.15        | 7200.00        | 376.88        | 0.00                       | 521.94        | 376.88        | 0.00                       | 181.11         | 376.88        | 0.00                       | 72.97          |
| LD20-2 | —             | —            | 389.09        | 7200.00        | 334.67        | 0.00                       | 1630.62       | 334.67        | 0.00                       | 334.67         | 334.67        | 0.00                       | 358.11         |
| LD20-3 | —             | —            | 382.88        | 7200.00        | 334.97        | 0.00                       | 1299.39       | 334.96        | 0.00                       | 369.50         | 334.96        | 0.00                       | 233.19         |
| LD21-1 | —             | —            | 495.10        | 7200.00        | 400.73        | 0.00                       | 321.13        | 400.73        | 0.00                       | 997.53         | 400.73        | 0.00                       | 326.20         |
| LD21-2 | —             | —            | 408.63        | 7200.00        | 348.67        | 2.70                       | 7200.00       | 348.67        | 3.56                       | 7200.00        | 348.67        | 10.44                      | 7200.00        |
| LD21-3 | —             | —            | 463.03        | 7200.00        | 365.98        | 0.00                       | 1434.91       | 365.98        | 0.00                       | 173.23         | 365.98        | 0.00                       | 57.48          |
|        | <b>—</b>      | <b>—</b>     | <b>392.43</b> | <b>7200.00</b> | <b>346.51</b> | <b>0.18<sup>(14)</sup></b> | <b>948.47</b> | <b>346.51</b> | <b>0.24<sup>(14)</sup></b> | <b>657.77</b>  | <b>346.51</b> | <b>0.70<sup>(14)</sup></b> | <b>562.27</b>  |
| LD26-1 | —             | —            | —             | —              | —             | —                          | —             | 362.36        | 5.57                       | 7200.00        | 362.36        | 6.85                       | 7200.00        |
| LD26-2 | —             | —            | —             | —              | —             | —                          | —             | 387.36        | 5.87                       | 7200.00        | 387.36        | 6.18                       | 7200.00        |
| LD26-3 | —             | —            | —             | —              | —             | —                          | —             | 369.81        | 1.79                       | 7200.00        | 369.81        | 5.47                       | 7200.00        |
| LD31-1 | —             | —            | —             | —              | —             | —                          | —             | 412.32        | 12.39                      | 7200.00        | 412.32        | 12.22                      | 7200.00        |
| LD31-2 | —             | —            | —             | —              | —             | —                          | —             | 382.71        | 11.19                      | 7200.00        | 382.71        | 12.28                      | 7200.00        |
| LD31-3 | —             | —            | —             | —              | —             | —                          | —             | 426.00        | 7.74                       | 7200.00        | 426.00        | 10.23                      | 7200.00        |
| LD36-1 | —             | —            | —             | —              | —             | —                          | —             | 447.29        | 21.01                      | 7200.00        | 447.29        | 18.18                      | 7200.00        |
| LD36-2 | —             | —            | —             | —              | —             | —                          | —             | 436.95        | 13.40                      | 7200.00        | 436.95        | 15.96                      | 7200.00        |
| LD36-3 | —             | —            | —             | —              | —             | —                          | —             | 473.32        | 11.94                      | 7200.00        | 473.32        | 11.41                      | 7200.00        |
| LD41-1 | —             | —            | —             | —              | —             | —                          | —             | 460.10        | 22.36                      | 7200.00        | 460.10        | 21.13                      | 7200.00        |
| LD41-2 | —             | —            | —             | —              | —             | —                          | —             | 482.70        | 21.45                      | 7200.00        | 482.70        | 18.64                      | 7200.00        |
| LD41-3 | —             | —            | —             | —              | —             | —                          | —             | 481.59        | 17.26                      | 7200.00        | 481.59        | 17.19                      | 7200.00        |
| LD46-1 | —             | —            | —             | —              | —             | —                          | —             | 483.54        | 18.25                      | 7200.00        | 483.54        | 18.07                      | 7200.00        |
| LD46-2 | —             | —            | —             | —              | —             | —                          | —             | 486.61        | 19.74                      | 7200.00        | 486.61        | 19.11                      | 7200.00        |
| LD46-3 | —             | —            | —             | —              | —             | —                          | —             | 537.06        | 16.00                      | 7200.00        | 537.06        | 14.54                      | 7200.00        |
| LD51-1 | —             | —            | —             | —              | —             | —                          | —             | 504.42        | 22.20                      | 7200.00        | 504.42        | 20.12                      | 7200.00        |
| LD51-2 | —             | —            | —             | —              | —             | —                          | —             | 497.88        | 27.44                      | 7200.00        | 497.88        | 25.35                      | 7200.00        |
| LD51-3 | —             | —            | —             | —              | —             | —                          | —             | 493.21        | 20.96                      | 7200.00        | 493.21        | 19.89                      | 7200.00        |
|        | <b>—</b>      | <b>—</b>     | <b>—</b>      | <b>—</b>       | <b>—</b>      | <b>—</b>                   | <b>—</b>      | <b>451.40</b> | <b>15.36<sup>(0)</sup></b> | <b>7200.00</b> | <b>451.40</b> | <b>15.16<sup>(0)</sup></b> | <b>7200.00</b> |

**Table 4 Comparison results of exact methods for VLD instances**

|         | Gambella      |              |               |                | Erdogan       |                            |               | this paper    |                            |                |               |                            |                |
|---------|---------------|--------------|---------------|----------------|---------------|----------------------------|---------------|---------------|----------------------------|----------------|---------------|----------------------------|----------------|
|         | RBA           |              | G2018         |                | E2021         |                            |               | Model+        |                            |                | LBBD          |                            |                |
|         | UB            | time         | UB            | time           | UB            | gap(%)                     | time          | UB            | gap(%)                     | time           | UB            | gap(%)                     | time           |
| VLD11-1 | 257.24        | 0.38         | 257.24        | 0.31           | 257.24        | 0.00                       | 3.67          | 257.24        | 0.00                       | 0.70           | 257.24        | 0.00                       | 0.08           |
| VLD11-2 | 324.75        | 0.12         | 324.75        | 0.08           | 324.75        | 0.00                       | 4.36          | 324.75        | 0.00                       | 0.61           | 324.75        | 0.00                       | 0.00           |
| VLD11-3 | 226.13        | 0.21         | 226.13        | 0.14           | 226.13        | 0.00                       | 4.34          | 226.13        | 0.00                       | 0.59           | 226.13        | 0.00                       | 0.06           |
| VLD12-1 | 326.04        | 0.18         | 326.04        | 0.14           | 326.04        | 0.00                       | 4.69          | 326.04        | 0.00                       | 1.22           | 326.04        | 0.00                       | 0.03           |
| VLD12-2 | 274.19        | 0.3          | 274.19        | 0.21           | 274.19        | 0.00                       | 4.44          | 274.19        | 0.00                       | 0.63           | 274.19        | 0.00                       | 0.05           |
| VLD12-3 | 281.94        | 0.55         | 281.94        | 0.50           | 281.94        | 0.00                       | 4.81          | 281.94        | 0.00                       | 0.86           | 281.94        | 0.00                       | 0.03           |
| VLD13-1 | 316.71        | 4.3          | 316.71        | 4.26           | 316.71        | 0.00                       | 16.13         | 316.71        | 0.00                       | 2.91           | 316.71        | 0.00                       | 0.50           |
| VLD13-2 | 239.26        | 1.6          | 239.26        | 1.56           | 239.26        | 0.00                       | 8.08          | 239.26        | 0.00                       | 0.94           | 239.26        | 0.00                       | 0.28           |
| VLD13-3 | 281.33        | 1.03         | 281.33        | 0.98           | 281.33        | 0.00                       | 7.61          | 281.33        | 0.00                       | 1.88           | 281.33        | 0.00                       | 0.13           |
| VLD14-1 | 319.63        | 6.89         | 319.63        | 11.69          | 319.63        | 0.00                       | 26.55         | 319.63        | 0.00                       | 10.11          | 319.63        | 0.00                       | 2.03           |
| VLD14-2 | 300.17        | 2.28         | 300.17        | 2.38           | 300.17        | 0.00                       | 10.14         | 300.17        | 0.00                       | 3.16           | 300.17        | 0.00                       | 0.44           |
| VLD14-3 | 280.37        | 2.77         | 280.37        | 3.70           | 280.37        | 0.00                       | 10.50         | 280.37        | 0.00                       | 2.48           | 280.37        | 0.00                       | 0.09           |
| VLD15-1 | 295.33        | 1.9          | 295.33        | 2.18           | 295.33        | 0.00                       | 15.61         | 295.33        | 0.00                       | 3.67           | 295.33        | 0.00                       | 0.47           |
| VLD15-2 | 314.70        | 10.64        | 314.70        | 50.91          | 314.70        | 0.00                       | 14.89         | 314.70        | 0.00                       | 3.45           | 314.70        | 0.00                       | 0.34           |
| VLD15-3 | 264.95        | 5.9          | 264.95        | 5.16           | 264.95        | 0.00                       | 13.63         | 264.95        | 0.00                       | 1.94           | 264.95        | 0.00                       | 0.36           |
| VLD16-1 | 379.91        | 65.06        | 379.91        | 624.76         | 379.91        | 0.00                       | 35.06         | 379.91        | 0.00                       | 12.28          | 379.91        | 0.00                       | 0.92           |
| VLD16-2 | 355.42        | 121.26       | 355.42        | 861.46         | 355.42        | 0.00                       | 62.16         | 355.42        | 0.00                       | 10.97          | 355.42        | 0.00                       | 1.98           |
| VLD16-3 | 305.99        | 722.48       | 305.99        | 3600.00        | 305.99        | 0.00                       | 157.83        | 305.99        | 0.00                       | 40.28          | 305.99        | 0.00                       | 9.03           |
|         | <b>296.89</b> | <b>52.66</b> | <b>296.89</b> | <b>287.25</b>  | <b>296.89</b> | <b>0.00<sup>(18)</sup></b> | <b>22.47</b>  | <b>296.89</b> | <b>0.00<sup>(18)</sup></b> | <b>5.48</b>    | <b>296.89</b> | <b>0.00<sup>(18)</sup></b> | <b>0.93</b>    |
| VLD17-1 | —             | —            | 363.22        | 7200.00        | 337.94        | 0.00                       | 94.53         | 337.94        | 0.00                       | 47.45          | 337.94        | 0.00                       | 6.66           |
| VLD17-2 | —             | —            | 342.21        | 7200.00        | 303.03        | 0.00                       | 30.62         | 303.03        | 0.00                       | 37.34          | 303.027       | 0.00                       | 4.77           |
| VLD17-3 | —             | —            | 398.66        | 7200.00        | 371.44        | 0.00                       | 32.65         | 371.44        | 0.00                       | 10.73          | 371.436       | 0.00                       | 1.94           |
| VLD18-1 | —             | —            | 359.39        | 7200.00        | 326.79        | 0.00                       | 25.95         | 326.80        | 0.00                       | 23.45          | 326.795       | 0.00                       | 2.92           |
| VLD18-2 | —             | —            | 369.31        | 7200.00        | 344.19        | 0.00                       | 389.31        | 344.19        | 0.00                       | 100.23         | 344.186       | 0.00                       | 43.08          |
| VLD18-3 | —             | —            | 358.17        | 7200.00        | 320.31        | 0.00                       | 40.90         | 320.31        | 0.00                       | 17.19          | 320.306       | 0.00                       | 4.45           |
| VLD19-1 | —             | —            | 399.65        | 7200.00        | 337.27        | 0.00                       | 68.31         | 337.27        | 0.00                       | 163.08         | 337.272       | 0.00                       | 29.11          |
| VLD19-2 | —             | —            | 399.02        | 7200.00        | 314.04        | 0.00                       | 64.92         | 314.04        | 0.00                       | 19.75          | 314.039       | 0.00                       | 2.91           |
| VLD19-3 | —             | —            | 425.96        | 7200.00        | 392.18        | 0.00                       | 559.74        | 392.18        | 0.00                       | 171.05         | 392.184       | 0.00                       | 111.80         |
| VLD20-1 | —             | —            | 387.35        | 7200.00        | 362.99        | 0.00                       | 576.73        | 362.99        | 0.00                       | 568.28         | 362.994       | 0.00                       | 108.77         |
| VLD20-2 | —             | —            | 435.12        | 7200.00        | 355.56        | 0.00                       | 133.79        | 355.56        | 0.00                       | 78.20          | 355.557       | 0.00                       | 14.33          |
| VLD20-3 | —             | —            | 381.21        | 7200.00        | 310.86        | 0.00                       | 168.59        | 310.86        | 0.00                       | 99.67          | 310.861       | 0.00                       | 160.83         |
| VLD21-1 | —             | —            | 466.43        | 7200.00        | 388.97        | 0.00                       | 3804.03       | 388.97        | 0.00                       | 340.64         | 388.968       | 0.00                       | 422.67         |
| VLD21-2 | —             | —            | 505.43        | 7200.00        | 387.86        | 0.00                       | 1224.05       | 387.86        | 0.00                       | 323.69         | 387.857       | 0.00                       | 430.19         |
| VLD21-3 | —             | —            | 419.35        | 7200.00        | 337.64        | 0.00                       | 1944.37       | 337.64        | 0.00                       | 505.95         | 337.64        | 0.00                       | 594.73         |
|         | —             | —            | <b>400.70</b> | <b>7200.00</b> | <b>346.07</b> | <b>0.00<sup>(15)</sup></b> | <b>610.57</b> | <b>346.07</b> | <b>0.00<sup>(15)</sup></b> | <b>167.11</b>  | <b>346.07</b> | <b>0.00<sup>(15)</sup></b> | <b>128.28</b>  |
| VLD26-1 | —             | —            | —             | —              | —             | —                          | —             | 344.70        | 8.17                       | 7200.00        | 344.70        | 10.76                      | 7200.00        |
| VLD26-2 | —             | —            | —             | —              | —             | —                          | —             | 414.97        | 10.04                      | 7200.00        | 414.97        | 10.40                      | 7200.00        |
| VLD26-3 | —             | —            | —             | —              | —             | —                          | —             | 386.03        | 5.84                       | 7200.00        | 386.03        | 6.33                       | 7200.00        |
| VLD31-1 | —             | —            | —             | —              | —             | —                          | —             | 406.19        | 9.00                       | 7200.00        | 406.19        | 9.76                       | 7200.00        |
| VLD31-2 | —             | —            | —             | —              | —             | —                          | —             | 407.27        | 9.66                       | 7200.00        | 407.27        | 9.53                       | 7200.00        |
| VLD31-3 | —             | —            | —             | —              | —             | —                          | —             | 401.43        | 7.26                       | 7200.00        | 401.43        | 9.13                       | 7200.00        |
| VLD36-1 | —             | —            | —             | —              | —             | —                          | —             | 421.04        | 15.00                      | 7200.00        | 421.04        | 14.80                      | 7200.00        |
| VLD36-2 | —             | —            | —             | —              | —             | —                          | —             | 414.01        | 15.25                      | 7200.00        | 414.01        | 15.42                      | 7200.00        |
| VLD36-3 | —             | —            | —             | —              | —             | —                          | —             | 406.21        | 20.52                      | 7200.00        | 406.21        | 20.31                      | 7200.00        |
| VLD41-1 | —             | —            | —             | —              | —             | —                          | —             | 459.25        | 15.85                      | 7200.00        | 459.25        | 15.42                      | 7200.00        |
| VLD41-2 | —             | —            | —             | —              | —             | —                          | —             | 419.16        | 26.81                      | 7200.00        | 419.15        | 24.35                      | 7200.00        |
| VLD41-3 | —             | —            | —             | —              | —             | —                          | —             | 450.69        | 21.80                      | 7200.00        | 450.69        | 19.83                      | 7200.00        |
| VLD46-1 | —             | —            | —             | —              | —             | —                          | —             | 423.62        | 23.16                      | 7200.00        | 423.62        | 23.15                      | 7200.00        |
| VLD46-2 | —             | —            | —             | —              | —             | —                          | —             | 490.50        | 17.77                      | 7200.00        | 490.50        | 16.92                      | 7200.00        |
| VLD46-3 | —             | —            | —             | —              | —             | —                          | —             | 472.23        | 24.20                      | 7200.00        | 472.23        | 22.51                      | 7200.00        |
| VLD51-1 | —             | —            | —             | —              | —             | —                          | —             | 493.89        | 21.88                      | 7200.00        | 493.89        | 20.74                      | 7200.00        |
| VLD51-2 | —             | —            | —             | —              | —             | —                          | —             | 459.69        | 32.41                      | 7200.00        | 459.69        | 28.47                      | 7200.00        |
| VLD51-3 | —             | —            | —             | —              | —             | —                          | —             | 488.37        | 31.02                      | 7200.00        | 488.37        | 27.46                      | 7200.00        |
|         | —             | —            | —             | —              | —             | —                          | —             | <b>431.07</b> | <b>17.54<sup>(0)</sup></b> | <b>7200.00</b> | <b>431.07</b> | <b>16.96<sup>(0)</sup></b> | <b>7200.00</b> |

Table 5 Comparison results of heuristic methods for instance set Gam72 with  $10 \leq n \leq 15$ 

|         |        |        | ?(ILS)               |       | TSIH   |        |                      |                      |      |
|---------|--------|--------|----------------------|-------|--------|--------|----------------------|----------------------|------|
|         | BKS    | UB     | $\Delta$ (%)         | time  | UB     | UB*    | $\Delta$ (%)         | $\Delta^*$ (%)       | time |
| SD11-1  | 108.76 | 108.76 | 0.00                 | 9.11  | 108.76 | 108.76 | 0.00                 | 0.00                 | 4.68 |
| SD11-2  | 113.92 | 113.92 | 0.00                 | 7.95  | 113.92 | 113.92 | 0.00                 | 0.00                 | 6.29 |
| SD11-3  | 125.19 | 125.19 | 0.00                 | 9.24  | 125.19 | 125.19 | 0.00                 | 0.00                 | 5.16 |
| SD12-1  | 107.60 | 107.60 | 0.00                 | 12.44 | 107.60 | 107.60 | 0.00                 | 0.00                 | 5.29 |
| SD12-2  | 153.94 | 154.02 | 0.05                 | 12.25 | 153.94 | 153.94 | 0.00                 | 0.00                 | 5.50 |
| SD12-3  | 118.61 | 118.61 | 0.00                 | 12.47 | 118.61 | 118.61 | 0.00                 | 0.00                 | 5.47 |
| SD13-1  | 116.12 | 116.12 | 0.00                 | 17.61 | 116.12 | 116.12 | 0.00                 | 0.00                 | 4.72 |
| SD13-2  | 136.86 | 137.06 | 0.15                 | 14.29 | 136.86 | 136.86 | 0.00                 | 0.00                 | 5.84 |
| SD13-3  | 121.47 | 121.47 | 0.00                 | 17.04 | 121.47 | 121.47 | 0.00                 | 0.00                 | 5.46 |
| SD14-1  | 128.14 | 128.14 | 0.00                 | 21.65 | 128.14 | 128.14 | 0.00                 | 0.00                 | 5.46 |
| SD14-2  | 124.66 | 124.66 | 0.00                 | 19.45 | 124.66 | 124.66 | 0.00                 | 0.00                 | 5.22 |
| SD14-3  | 138.07 | 138.07 | 0.00                 | 20.05 | 138.07 | 138.07 | 0.00                 | 0.00                 | 5.99 |
| SD15-1  | 123.67 | 125.79 | 1.69                 | 24.03 | 123.67 | 123.67 | 0.00                 | 0.00                 | 6.47 |
| SD15-2  | 136.10 | 136.64 | 0.39                 | 25.18 | 136.10 | 136.10 | 0.00                 | 0.00                 | 5.35 |
| SD15-3  | 132.72 | 134.37 | 1.23                 | 23.38 | 132.72 | 132.72 | 0.00                 | 0.00                 | 6.28 |
| SD16-1  | 145.10 | 145.10 | 0.00                 | 32.21 | 145.10 | 145.10 | 0.00                 | 0.00                 | 5.35 |
| SD16-2  | 155.36 | 155.58 | 0.14                 | 30.37 | 155.36 | 155.36 | 0.00                 | 0.00                 | 5.95 |
| SD16-3  | 128.38 | 128.38 | 0.00                 | 31.21 | 128.38 | 128.38 | 0.00                 | 0.00                 | 7.15 |
|         | 128.59 | 128.86 | 0.20 <sup>(12)</sup> | 18.89 | 128.59 | 128.59 | 0.00 <sup>(18)</sup> | 0.00 <sup>(18)</sup> | 5.65 |
| MD11-1  | 146.85 | 146.85 | 0.00                 | 9.49  | 146.85 | 146.85 | 0.00                 | 0.00                 | 4.49 |
| MD11-2  | 132.12 | 132.12 | 0.00                 | 9.59  | 132.12 | 132.12 | 0.00                 | 0.00                 | 4.54 |
| MD11-3  | 133.42 | 133.48 | 0.05                 | 9.18  | 133.42 | 133.42 | 0.00                 | 0.00                 | 5.03 |
| MD12-1  | 157.74 | 157.85 | 0.07                 | 13.31 | 157.74 | 157.74 | 0.00                 | 0.00                 | 5.68 |
| MD12-2  | 165.63 | 165.74 | 0.07                 | 13.51 | 165.63 | 165.63 | 0.00                 | 0.00                 | 4.82 |
| MD12-3  | 121.24 | 121.24 | 0.00                 | 12.45 | 121.24 | 121.24 | 0.00                 | 0.00                 | 4.39 |
| MD13-1  | 150.89 | 151.11 | 0.14                 | 15.54 | 150.89 | 150.89 | 0.00                 | 0.00                 | 6.13 |
| MD13-2  | 130.99 | 131.35 | 0.27                 | 16.53 | 130.99 | 130.99 | 0.00                 | 0.00                 | 5.64 |
| MD13-3  | 150.37 | 150.37 | 0.00                 | 16.10 | 150.37 | 150.37 | 0.00                 | 0.00                 | 5.32 |
| MD14-1  | 146.95 | 146.95 | 0.00                 | 19.52 | 146.95 | 146.95 | 0.00                 | 0.00                 | 5.76 |
| MD14-2  | 163.59 | 163.59 | 0.00                 | 18.82 | 163.59 | 163.59 | 0.00                 | 0.00                 | 5.56 |
| MD14-3  | 153.01 | 153.01 | 0.00                 | 19.44 | 153.01 | 153.01 | 0.00                 | 0.00                 | 5.62 |
| MD15-1  | 168.24 | 168.24 | 0.00                 | 23.17 | 168.24 | 168.24 | 0.00                 | 0.00                 | 5.17 |
| MD15-2  | 136.94 | 136.94 | 0.00                 | 23.15 | 136.94 | 136.94 | 0.00                 | 0.00                 | 5.33 |
| MD15-3  | 157.86 | 157.86 | 0.00                 | 23.72 | 157.86 | 157.86 | 0.00                 | 0.00                 | 5.82 |
| MD16-1  | 166.21 | 166.21 | 0.00                 | 34.78 | 166.21 | 166.21 | 0.00                 | 0.00                 | 5.89 |
| MD16-2  | 177.23 | 177.50 | 0.15                 | 30.46 | 177.23 | 177.23 | 0.00                 | 0.00                 | 6.86 |
| MD16-3  | 164.37 | 164.37 | 0.00                 | 29.75 | 164.37 | 164.37 | 0.00                 | 0.00                 | 5.89 |
|         | 151.31 | 151.38 | 0.04 <sup>(12)</sup> | 18.81 | 151.31 | 151.31 | 0.00 <sup>(18)</sup> | 0.00 <sup>(18)</sup> | 5.44 |
| LD11-1  | 311.55 | 311.55 | 0.00                 | 10.62 | 311.55 | 311.55 | 0.00                 | 0.00                 | 3.80 |
| LD11-2  | 345.19 | 345.19 | 0.00                 | 10.15 | 345.19 | 345.19 | 0.00                 | 0.00                 | 4.32 |
| LD11-3  | 299.53 | 299.53 | 0.00                 | 10.05 | 299.53 | 299.53 | 0.00                 | 0.00                 | 4.36 |
| LD12-1  | 296.07 | 296.07 | 0.00                 | 12.55 | 296.07 | 296.07 | 0.00                 | 0.00                 | 4.64 |
| LD12-2  | 308.26 | 308.26 | 0.00                 | 12.59 | 308.26 | 308.26 | 0.00                 | 0.00                 | 4.69 |
| LD12-3  | 270.31 | 270.31 | 0.00                 | 14.08 | 270.31 | 270.31 | 0.00                 | 0.00                 | 4.47 |
| LD13-1  | 261.64 | 261.64 | 0.00                 | 17.24 | 261.64 | 261.64 | 0.00                 | 0.00                 | 4.84 |
| LD13-2  | 294.85 | 294.85 | 0.00                 | 16.99 | 294.85 | 294.85 | 0.00                 | 0.00                 | 4.78 |
| LD13-3  | 307.34 | 307.34 | 0.00                 | 17.32 | 307.34 | 307.34 | 0.00                 | 0.00                 | 4.95 |
| LD14-1  | 319.80 | 319.80 | 0.00                 | 21.41 | 319.80 | 319.80 | 0.00                 | 0.00                 | 4.89 |
| LD14-2  | 282.91 | 282.91 | 0.00                 | 19.64 | 282.91 | 282.91 | 0.00                 | 0.00                 | 5.24 |
| LD14-3  | 301.60 | 301.60 | 0.00                 | 22.22 | 301.60 | 301.60 | 0.00                 | 0.00                 | 4.81 |
| LD15-1  | 299.04 | 299.04 | 0.00                 | 26.32 | 299.04 | 299.04 | 0.00                 | 0.00                 | 5.37 |
| LD15-2  | 314.01 | 314.01 | 0.00                 | 24.94 | 314.01 | 314.01 | 0.00                 | 0.00                 | 5.34 |
| LD15-3  | 324.79 | 324.79 | 0.00                 | 25.70 | 324.79 | 324.79 | 0.00                 | 0.00                 | 5.70 |
| LD16-1  | 322.05 | 322.05 | 0.00                 | 31.75 | 322.05 | 322.05 | 0.00                 | 0.00                 | 5.31 |
| LD16-2  | 338.70 | 338.70 | 0.00                 | 31.20 | 338.70 | 338.70 | 0.00                 | 0.00                 | 6.44 |
| LD16-3  | 353.87 | 354.89 | 0.29                 | 29.38 | 353.87 | 353.87 | 0.00                 | 0.00                 | 7.73 |
|         | 308.42 | 308.47 | 0.02 <sup>(17)</sup> | 19.68 | 308.42 | 308.42 | 0.00 <sup>(18)</sup> | 0.00 <sup>(18)</sup> | 5.09 |
| VLD11-1 | 257.24 | 257.24 | 0.00                 | 10.51 | 257.24 | 257.24 | 0.00                 | 0.00                 | 4.97 |
| VLD11-2 | 324.75 | 324.75 | 0.00                 | 11.13 | 324.75 | 324.75 | 0.00                 | 0.00                 | 4.07 |
| VLD11-3 | 226.13 | 226.13 | 0.00                 | 10.92 | 226.13 | 226.13 | 0.00                 | 0.00                 | 4.70 |
| VLD12-1 | 326.04 | 326.04 | 0.00                 | 14.59 | 326.04 | 326.04 | 0.00                 | 0.00                 | 4.59 |
| VLD12-2 | 274.19 | 274.19 | 0.00                 | 15.67 | 274.19 | 274.19 | 0.00                 | 0.00                 | 4.58 |
| VLD12-3 | 281.94 | 281.94 | 0.00                 | 13.48 | 281.94 | 281.94 | 0.00                 | 0.00                 | 4.46 |
| VLD13-1 | 316.71 | 316.74 | 0.01                 | 19.59 | 316.71 | 316.71 | 0.00                 | 0.00                 | 5.67 |
| VLD13-2 | 239.26 | 239.26 | 0.00                 | 18.62 | 239.26 | 239.26 | 0.00                 | 0.00                 | 4.58 |
| VLD13-3 | 281.33 | 281.33 | 0.00                 | 18.24 | 281.33 | 281.33 | 0.00                 | 0.00                 | 4.79 |
| VLD14-1 | 319.63 | 319.63 | 0.00                 | 23.04 | 319.63 | 319.63 | 0.00                 | 0.00                 | 4.90 |
| VLD14-2 | 300.17 | 300.17 | 0.00                 | 25.53 | 300.17 | 300.17 | 0.00                 | 0.00                 | 5.06 |
| VLD14-3 | 280.37 | 280.37 | 0.00                 | 25.28 | 280.37 | 280.37 | 0.00                 | 0.00                 | 4.74 |
| VLD15-1 | 295.33 | 295.33 | 0.00                 | 28.47 | 295.33 | 295.33 | 0.00                 | 0.00                 | 5.14 |
| VLD15-2 | 314.70 | 314.7  | 0.00                 | 30.90 | 314.70 | 314.70 | 0.00                 | 0.00                 | 5.05 |
| VLD15-3 | 264.95 | 264.95 | 0.00                 | 29.80 | 264.95 | 264.95 | 0.00                 | 0.00                 | 4.91 |
| VLD16-1 | 379.91 | 379.91 | 0.00                 | 31.04 | 379.91 | 379.91 | 0.00                 | 0.00                 | 6.02 |
| VLD16-2 | 355.42 | 355.42 | 0.00                 | 35.41 | 355.42 | 355.42 | 0.00                 | 0.00                 | 5.85 |
| VLD16-3 | 305.99 | 306.32 | 0.11                 | 31.14 | 305.99 | 305.99 | 0.00                 | 0.00                 | 6.02 |
|         | 296.89 | 296.91 | 0.01 <sup>(16)</sup> | 21.85 | 296.89 | 296.89 | 0.00 <sup>(18)</sup> | 0.00 <sup>(18)</sup> | 5.01 |

**Table 6** Comparison results of heuristic methods for instance set Gam72 with  $16 \leq n \leq 20$ 

|         | BKS           | ?(ILS)        |                            |              | TSIH          |               |                            |                            |
|---------|---------------|---------------|----------------------------|--------------|---------------|---------------|----------------------------|----------------------------|
|         |               | UB            | $\Delta$ (%)               | time         | UB            | UB*           | $\Delta$ (%)               | $\Delta^*$ (%)             |
| SD17-1  | 285.58        | 285.66        | 0.03                       | 36.03        | 285.58        | 285.58        | 0.00                       | 0.00                       |
| SD17-2  | 341.49        | 341.49        | 0.00                       | 40.97        | 341.49        | 341.49        | 0.00                       | 0.00                       |
| SD17-3  | 270.31        | 270.31        | 0.00                       | 37.01        | 270.31        | 270.31        | 0.00                       | 0.00                       |
| SD18-1  | 329.47        | 329.47        | 0.00                       | 46.34        | 329.47        | 329.47        | 0.00                       | 0.00                       |
| SD18-2  | 314.49        | 314.49        | 0.00                       | 44.48        | 314.49        | 314.49        | 0.00                       | 0.00                       |
| SD18-3  | 341.80        | 342.03        | 0.07                       | 44.04        | 341.80        | 341.80        | 0.00                       | 0.00                       |
| SD19-1  | 359.70        | 360.02        | 0.09                       | 48.37        | 359.70        | 359.70        | 0.00                       | 0.00                       |
| SD19-2  | 312.15        | 312.15        | 0.00                       | 54.76        | 312.15        | 312.15        | 0.00                       | 0.00                       |
| SD19-3  | 379.31        | 379.31        | 0.00                       | 52.82        | 379.31        | 379.31        | 0.00                       | 0.00                       |
| SD20-1  | 365.93        | 365.93        | 0.00                       | 56.73        | 365.93        | 365.93        | 0.00                       | 0.00                       |
| SD20-2  | 355.71        | 355.92        | 0.06                       | 53.10        | 355.71        | 355.71        | 0.00                       | 0.00                       |
| SD20-3  | 341.76        | 341.76        | 0.00                       | 62.59        | 341.76        | 341.76        | 0.00                       | 0.00                       |
| SD21-1  | 371.82        | 371.82        | 0.00                       | 71.05        | 371.82        | 371.82        | 0.00                       | 0.00                       |
| SD21-2  | 373.80        | 375.85        | 0.55                       | 66.34        | 373.80        | 373.80        | 0.00                       | 0.00                       |
| SD21-3  | 350.28        | 350.93        | 0.18                       | 65.70        | 350.28        | 350.28        | 0.00                       | 0.00                       |
|         | <b>339.57</b> | <b>339.81</b> | <b>0.07<sup>(9)</sup></b>  | <b>52.02</b> | <b>339.57</b> | <b>339.57</b> | <b>0.00<sup>(15)</sup></b> | <b>0.00<sup>(15)</sup></b> |
| MD17-1  | 322.21        | 322.21        | 0.00                       | 38.20        | 322.21        | 322.21        | 0.00                       | 0.00                       |
| MD17-2  | 350.08        | 350.08        | 0.00                       | 36.55        | 350.08        | 350.08        | 0.00                       | 0.00                       |
| MD17-3  | 356.27        | 356.27        | 0.00                       | 40.59        | 356.27        | 356.27        | 0.00                       | 0.00                       |
| MD18-1  | 346.43        | 346.47        | 0.01                       | 46.71        | 346.43        | 346.43        | 0.00                       | 0.00                       |
| MD18-2  | 335.27        | 335.27        | 0.00                       | 42.63        | 335.27        | 335.27        | 0.00                       | 0.00                       |
| MD18-3  | 376.28        | 376.41        | 0.04                       | 45.62        | 376.28        | 376.28        | 0.00                       | 0.00                       |
| MD19-1  | 364.45        | 364.45        | 0.00                       | 48.23        | 364.45        | 364.45        | 0.00                       | 0.00                       |
| MD19-2  | 370.01        | 370.01        | 0.00                       | 51.52        | 370.01        | 370.01        | 0.00                       | 0.00                       |
| MD19-3  | 345.01        | 345.01        | 0.00                       | 48.04        | 345.01        | 345.01        | 0.00                       | 0.00                       |
| MD20-1  | 341.91        | 341.91        | 0.00                       | 59.70        | 341.91        | 341.91        | 0.00                       | 0.00                       |
| MD20-2  | 332.47        | 332.47        | 0.00                       | 54.35        | 332.47        | 332.47        | 0.00                       | 0.00                       |
| MD20-3  | 342.91        | 342.91        | 0.00                       | 60.96        | 342.91        | 342.91        | 0.00                       | 0.00                       |
| MD21-1  | 363.66        | 363.77        | 0.03                       | 69.91        | 363.66        | 363.66        | 0.00                       | 0.00                       |
| MD21-2  | 344.70        | 344.71        | 0.00                       | 69.76        | 344.70        | 344.70        | 0.00                       | 0.00                       |
| MD21-3  | 363.71        | 363.71        | 0.00                       | 74.47        | 363.71        | 363.71        | 0.00                       | 0.00                       |
|         | <b>350.36</b> | <b>350.38</b> | <b>0.01<sup>(12)</sup></b> | <b>52.48</b> | <b>350.36</b> | <b>350.36</b> | <b>0.00<sup>(15)</sup></b> | <b>0.00<sup>(15)</sup></b> |
| LD17-1  | 380.11        | 380.11        | 0.00                       | 38.45        | 380.11        | 380.11        | 0.00                       | 0.00                       |
| LD17-2  | 323.68        | 323.68        | 0.00                       | 37.38        | 323.68        | 323.68        | 0.00                       | 0.00                       |
| LD17-3  | 349.20        | 349.20        | 0.00                       | 36.23        | 349.20        | 349.20        | 0.00                       | 0.00                       |
| LD18-1  | 329.43        | 329.43        | 0.00                       | 45.54        | 329.43        | 329.43        | 0.00                       | 0.00                       |
| LD18-2  | 287.78        | 287.78        | 0.00                       | 41.00        | 287.78        | 287.78        | 0.00                       | 0.00                       |
| LD18-3  | 368.89        | 369.28        | 0.11                       | 40.96        | 368.89        | 368.89        | 0.00                       | 0.00                       |
| LD19-1  | 313.50        | 313.64        | 0.05                       | 52.77        | 313.50        | 313.50        | 0.00                       | 0.00                       |
| LD19-2  | 359.53        | 359.53        | 0.00                       | 51.09        | 359.53        | 359.53        | 0.00                       | 0.00                       |
| LD19-3  | 323.57        | 323.57        | 0.00                       | 47.94        | 323.57        | 323.57        | 0.00                       | 0.00                       |
| LD20-1  | 376.88        | 376.88        | 0.00                       | 57.20        | 376.88        | 376.88        | 0.00                       | 0.00                       |
| LD20-2  | 334.67        | 334.67        | 0.00                       | 58.10        | 334.67        | 334.67        | 0.00                       | 0.00                       |
| LD20-3  | 334.96        | 334.97        | 0.00                       | 60.60        | 334.96        | 334.96        | 0.00                       | 0.00                       |
| LD21-1  | 400.73        | 400.73        | 0.00                       | 78.02        | 400.73        | 400.73        | 0.00                       | 0.00                       |
| LD21-2  | 348.67        | 349.17        | 0.14                       | 72.73        | 348.67        | 348.67        | 0.00                       | 0.00                       |
| LD21-3  | 365.98        | 366.11        | 0.04                       | 66.89        | 365.98        | 365.98        | 0.00                       | 0.00                       |
|         | <b>346.50</b> | <b>346.58</b> | <b>0.02<sup>(11)</sup></b> | <b>52.33</b> | <b>346.50</b> | <b>346.50</b> | <b>0.00<sup>(15)</sup></b> | <b>0.00<sup>(15)</sup></b> |
| VLD17-1 | 337.94        | 337.94        | 0.00                       | 39.93        | 337.94        | 337.94        | 0.00                       | 0.00                       |
| VLD17-2 | 303.03        | 303.03        | 0.00                       | 39.06        | 303.03        | 303.03        | 0.00                       | 0.00                       |
| VLD17-3 | 371.44        | 371.44        | 0.00                       | 41.58        | 371.44        | 371.44        | 0.00                       | 0.00                       |
| VLD18-1 | 326.80        | 326.8         | 0.00                       | 45.35        | 326.80        | 326.80        | 0.00                       | 0.00                       |
| VLD18-2 | 344.19        | 344.79        | 0.18                       | 44.39        | 344.19        | 344.19        | 0.00                       | 0.00                       |
| VLD18-3 | 320.31        | 320.31        | 0.00                       | 50.47        | 320.31        | 320.31        | 0.00                       | 0.00                       |
| VLD19-1 | 337.27        | 337.27        | 0.00                       | 51.07        | 337.27        | 337.27        | 0.00                       | 0.00                       |
| VLD19-2 | 314.04        | 314.04        | 0.00                       | 51.60        | 314.04        | 314.04        | 0.00                       | 0.00                       |
| VLD19-3 | 392.18        | 392.18        | 0.00                       | 50.39        | 392.18        | 392.18        | 0.00                       | 0.00                       |
| VLD20-1 | 362.99        | 362.99        | 0.00                       | 57.22        | 362.99        | 362.99        | 0.00                       | 0.00                       |
| VLD20-2 | 355.56        | 355.6         | 0.01                       | 59.94        | 355.56        | 355.56        | 0.00                       | 0.00                       |
| VLD20-3 | 310.86        | 310.86        | 0.00                       | 57.39        | 310.86        | 310.86        | 0.00                       | 0.00                       |
| VLD21-1 | 388.97        | 389.4         | 0.11                       | 63.77        | 388.97        | 388.97        | 0.00                       | 0.00                       |
| VLD21-2 | 387.86        | 387.86        | 0.00                       | 72.35        | 387.86        | 387.86        | 0.00                       | 0.00                       |
| VLD21-3 | 337.64        | 337.64        | 0.00                       | 63.90        | 337.64        | 337.64        | 0.00                       | 0.00                       |
|         | <b>346.07</b> | <b>346.14</b> | <b>0.02<sup>(12)</sup></b> | <b>52.56</b> | <b>346.07</b> | <b>346.07</b> | <b>0.00<sup>(15)</sup></b> | <b>0.00<sup>(15)</sup></b> |

**Table 7** Comparison results of heuristic methods for instance set Erd132 with  $25 \leq n \leq 50$ 

|         | LBBD          |               |              |                | $\Psi$ (ILS)  |               |              |                            | TSIH          |               |               |              |                            |              |
|---------|---------------|---------------|--------------|----------------|---------------|---------------|--------------|----------------------------|---------------|---------------|---------------|--------------|----------------------------|--------------|
|         | BKS           | UB            | $\Delta$ (%) | time           | UB            | UB*           | $\Delta$ (%) | $\Delta^*$ (%)             | time          | UB            | UB*           | $\Delta$ (%) | $\Delta^*$ (%)             | time         |
| SD26-1  | 393.55        | 393.55        | 0.00         | 7200.00        | 393.56        | 393.56        | 0.00         | 0.00                       | 114.25        | 393.55        | 393.55        | 0.00         | 0.00                       | 9.41         |
| SD26-2  | 413.12        | 413.12        | 0.00         | 7200.00        | 413.12        | 413.12        | 0.00         | 0.00                       | 109.32        | 413.12        | 413.12        | 0.00         | 0.00                       | 7.88         |
| SD26-3  | 377.82        | 377.82        | 0.00         | 7200.00        | 378.69        | 378.69        | 0.23         | 0.23                       | 112.36        | 377.82        | 377.82        | 0.00         | 0.00                       | 8.70         |
| SD31-1  | 406.69        | 406.69        | 0.00         | 7200.00        | 408.99        | 408.99        | 0.56         | 0.56                       | 186.34        | 406.69        | 406.69        | 0.00         | 0.00                       | 10.44        |
| SD31-2  | 348.83        | 348.83        | 0.00         | 7200.00        | 352.59        | 352.59        | 1.07         | 1.07                       | 157.93        | 348.83        | 348.83        | 0.00         | 0.00                       | 14.07        |
| SD31-3  | 388.68        | 388.68        | 0.00         | 7200.00        | 390.10        | 388.68        | 0.36         | 0.00                       | 161.96        | 389.44        | 388.68        | 0.20         | 0.00                       | 11.03        |
| SD36-1  | 477.51        | 477.51        | 0.00         | 7200.00        | 479.52        | 479.52        | 0.42         | 0.42                       | 240.47        | 477.54        | 477.51        | 0.01         | 0.00                       | 13.75        |
| SD36-2  | 412.96        | 412.96        | 0.00         | 7200.00        | 413.77        | 413.77        | 0.20         | 0.20                       | 234.43        | 412.96        | 412.96        | 0.00         | 0.00                       | 11.29        |
| SD36-3  | 384.89        | 384.89        | 0.00         | 7200.00        | 384.90        | 384.90        | 0.00         | 0.00                       | 246.15        | 384.89        | 384.89        | 0.00         | 0.00                       | 14.60        |
| SD41-1  | 478.33        | 484.00        | 1.17         | 7200.00        | 485.61        | 485.61        | 1.50         | 1.50                       | 328.54        | 478.33        | 478.33        | 0.00         | 0.00                       | 17.03        |
| SD41-2  | 452.43        | 452.43        | 0.00         | 7200.00        | 452.43        | 452.43        | 0.00         | 0.00                       | 329.00        | 452.43        | 452.43        | 0.00         | 0.00                       | 19.24        |
| SD41-3  | 452.86        | 452.86        | 0.00         | 7200.00        | 455.08        | 455.08        | 0.49         | 0.49                       | 365.14        | 452.86        | 452.86        | 0.00         | 0.00                       | 19.28        |
| SD46-1  | 504.48        | 504.77        | 0.06         | 7200.00        | 504.77        | 504.77        | 0.06         | 0.06                       | 460.09        | 504.48        | 504.48        | 0.00         | 0.00                       | 18.09        |
| SD46-2  | 416.15        | 416.15        | 0.00         | 7200.00        | 417.48        | 417.48        | 0.32         | 0.32                       | 456.20        | 416.15        | 416.15        | 0.00         | 0.00                       | 19.51        |
| SD46-3  | 506.14        | 509.39        | 0.64         | 7200.00        | 509.55        | 509.55        | 0.67         | 0.67                       | 466.12        | 506.43        | 506.14        | 0.06         | 0.00                       | 20.28        |
| SD51-1  | 448.45        | 449.49        | 0.23         | 7200.00        | 449.58        | 449.58        | 0.25         | 0.25                       | 611.47        | 448.46        | 448.45        | 0.00         | 0.00                       | 21.52        |
| SD51-2  | 445.98        | 445.98        | 0.00         | 7200.00        | 448.58        | 448.58        | 0.58         | 0.58                       | 620.98        | 445.98        | 445.98        | 0.00         | 0.00                       | 31.54        |
| SD51-3  | 508.49        | 508.49        | 0.00         | 7200.00        | 512.18        | 512.18        | 0.72         | 0.72                       | 631.85        | 508.49        | 508.49        | 0.00         | 0.00                       | 26.53        |
|         | <b>434.30</b> | <b>434.87</b> | <b>0.12</b>  | <b>7200.00</b> | <b>436.14</b> | <b>436.06</b> | <b>0.41</b>  | <b>0.39<sup>(3)</sup></b>  | <b>324.03</b> | <b>434.36</b> | <b>434.30</b> | <b>0.01</b>  | <b>0.00<sup>(18)</sup></b> | <b>16.34</b> |
| MD26-1  | 345.22        | 345.22        | 0.00         | 6408.50        | 345.22        | 345.22        | 0.00         | 0.00                       | 122.42        | 345.22        | 345.22        | 0.00         | 0.00                       | 7.19         |
| MD26-2  | 416.73        | 416.73        | 0.00         | 7200.00        | 417.27        | 416.73        | 0.13         | 0.00                       | 104.45        | 416.73        | 416.73        | 0.00         | 0.00                       | 9.73         |
| MD26-3  | 412.08        | 413.67        | 0.38         | 7200.00        | 413.35        | 412.09        | 0.31         | 0.00                       | 109.62        | 412.09        | 412.09        | 0.00         | 0.00                       | 9.27         |
| MD31-1  | 424.24        | 424.24        | 0.00         | 7200.00        | 424.24        | 424.24        | 0.00         | 0.00                       | 173.22        | 424.24        | 424.24        | 0.00         | 0.00                       | 10.09        |
| MD31-2  | 413.47        | 413.47        | 0.00         | 7200.00        | 413.55        | 413.47        | 0.02         | 0.00                       | 171.95        | 413.47        | 413.47        | 0.00         | 0.00                       | 13.33        |
| MD31-3  | 473.10        | 473.10        | 0.00         | 7200.00        | 473.10        | 473.10        | 0.00         | 0.00                       | 172.87        | 473.10        | 473.10        | 0.00         | 0.00                       | 10.99        |
| MD36-1  | 426.02        | 426.02        | 0.00         | 7200.00        | 431.14        | 431.14        | 1.19         | 1.19                       | 244.57        | 426.02        | 426.02        | 0.00         | 0.00                       | 11.41        |
| MD36-2  | 419.85        | 419.85        | 0.00         | 7200.00        | 419.99        | 419.99        | 0.03         | 0.03                       | 246.84        | 419.85        | 419.85        | 0.00         | 0.00                       | 13.89        |
| MD36-3  | 368.41        | 368.41        | 0.00         | 7200.00        | 375.21        | 375.21        | 1.81         | 1.81                       | 225.14        | 368.65        | 368.41        | 0.07         | 0.00                       | 14.16        |
| MD41-1  | 447.81        | 447.81        | 0.00         | 7200.00        | 448.76        | 448.76        | 0.21         | 0.21                       | 313.00        | 447.81        | 447.81        | 0.00         | 0.00                       | 19.15        |
| MD41-2  | 427.43        | 427.43        | 0.00         | 7200.00        | 427.43        | 427.43        | 0.00         | 0.00                       | 326.27        | 427.43        | 427.43        | 0.00         | 0.00                       | 20.31        |
| MD41-3  | 472.19        | 472.19        | 0.00         | 7200.00        | 474.80        | 474.80        | 0.55         | 0.55                       | 338.76        | 472.19        | 472.19        | 0.00         | 0.00                       | 18.38        |
| MD46-1  | 470.28        | 473.33        | 0.64         | 7200.00        | 475.46        | 475.46        | 1.09         | 1.09                       | 447.51        | 470.28        | 470.28        | 0.00         | 0.00                       | 18.02        |
| MD46-2  | 481.06        | 481.06        | 0.00         | 7200.00        | 485.85        | 485.85        | 0.99         | 0.99                       | 442.42        | 481.06        | 481.06        | 0.00         | 0.00                       | 23.11        |
| MD46-3  | 526.81        | 527.79        | 0.19         | 7200.00        | 527.79        | 527.79        | 0.19         | 0.19                       | 449.39        | 526.81        | 526.81        | 0.00         | 0.00                       | 22.80        |
| MD51-1  | 467.44        | 468.69        | 0.27         | 7200.00        | 471.55        | 471.55        | 0.87         | 0.87                       | 648.69        | 467.44        | 467.44        | 0.00         | 0.00                       | 31.62        |
| MD51-2  | 493.47        | 493.84        | 0.07         | 7200.00        | 498.48        | 498.48        | 1.00         | 1.00                       | 602.42        | 493.49        | 493.47        | 0.00         | 0.00                       | 27.00        |
| MD51-3  | 504.62        | 504.62        | 0.00         | 7200.00        | 509.48        | 504.62        | 0.95         | 0.00                       | 631.86        | 504.62        | 504.62        | 0.00         | 0.00                       | 22.86        |
|         | <b>443.90</b> | <b>444.30</b> | <b>0.09</b>  | <b>7156.03</b> | <b>446.26</b> | <b>445.89</b> | <b>0.52</b>  | <b>0.44<sup>(7)</sup></b>  | <b>320.63</b> | <b>443.92</b> | <b>443.90</b> | <b>0.00</b>  | <b>0.00<sup>(18)</sup></b> | <b>16.85</b> |
| LD26-1  | 362.36        | 362.36        | 0.00         | 7200.00        | 363.06        | 362.36        | 0.19         | 0.00                       | 116.08        | 362.43        | 362.36        | 0.02         | 0.00                       | 10.20        |
| LD26-2  | 387.36        | 387.36        | 0.00         | 7200.00        | 387.36        | 387.36        | 0.00         | 0.00                       | 111.56        | 387.36        | 387.36        | 0.00         | 0.00                       | 8.89         |
| LD26-3  | 369.81        | 369.81        | 0.00         | 7200.00        | 371.37        | 369.81        | 0.42         | 0.00                       | 109.64        | 369.81        | 369.81        | 0.00         | 0.00                       | 9.44         |
| LD31-1  | 412.32        | 412.32        | 0.00         | 7200.00        | 412.46        | 412.32        | 0.04         | 0.00                       | 158.96        | 412.32        | 412.32        | 0.00         | 0.00                       | 11.71        |
| LD31-2  | 382.71        | 382.71        | 0.00         | 7200.00        | 382.81        | 382.81        | 0.03         | 0.03                       | 162.85        | 382.71        | 382.71        | 0.00         | 0.00                       | 11.69        |
| LD31-3  | 426.00        | 426.00        | 0.00         | 7200.00        | 426.00        | 426.00        | 0.00         | 0.00                       | 165.45        | 426.00        | 426.00        | 0.00         | 0.00                       | 9.84         |
| LD36-1  | 447.29        | 447.29        | 0.00         | 7200.00        | 447.29        | 447.29        | 0.00         | 0.00                       | 233.80        | 447.29        | 447.29        | 0.00         | 0.00                       | 17.84        |
| LD36-2  | 436.95        | 436.95        | 0.00         | 7200.00        | 436.95        | 436.95        | 0.00         | 0.00                       | 240.79        | 436.95        | 436.95        | 0.00         | 0.00                       | 14.63        |
| LD36-3  | 473.32        | 473.32        | 0.00         | 7200.00        | 473.32        | 473.32        | 0.00         | 0.00                       | 231.24        | 473.32        | 473.32        | 0.00         | 0.00                       | 12.32        |
| LD41-1  | 460.10        | 460.10        | 0.00         | 7200.00        | 460.80        | 460.80        | 0.15         | 0.15                       | 329.50        | 460.10        | 460.10        | 0.00         | 0.00                       | 14.50        |
| LD41-2  | 482.70        | 482.70        | 0.00         | 7200.00        | 482.70        | 482.70        | 0.00         | 0.00                       | 327.44        | 482.70        | 482.70        | 0.00         | 0.00                       | 18.79        |
| LD41-3  | 481.59        | 481.59        | 0.00         | 7200.00        | 491.53        | 491.53        | 2.02         | 2.02                       | 343.40        | 481.59        | 481.59        | 0.00         | 0.00                       | 23.69        |
| LD46-1  | 483.54        | 483.54        | 0.00         | 7200.00        | 483.54        | 483.54        | 0.00         | 0.00                       | 442.82        | 483.54        | 483.54        | 0.00         | 0.00                       | 22.80        |
| LD46-2  | 486.61        | 486.61        | 0.00         | 7200.00        | 488.92        | 488.92        | 0.47         | 0.47                       | 451.89        | 486.61        | 486.61        | 0.00         | 0.00                       | 16.69        |
| LD46-3  | 537.06        | 537.06        | 0.00         | 7200.00        | 541.70        | 541.70        | 0.86         | 0.86                       | 455.37        | 537.30        | 537.06        | 0.04         | 0.00                       | 20.16        |
| LD51-1  | 504.42        | 504.69        | 0.05         | 7200.00        | 504.69        | 504.69        | 0.05         | 0.05                       | 606.34        | 504.65        | 504.42        | 0.05         | 0.00                       | 25.25        |
| LD51-2  | 497.88        | 497.88        | 0.00         | 7200.00        | 498.95        | 498.95        | 0.21         | 0.21                       | 672.29        | 497.88        | 497.88        | 0.00         | 0.00                       | 21.93        |
| LD51-3  | 493.20        | 493.21        | 0.00         | 7200.00        | 493.20        | 493.20        | 0.00         | 0.00                       | 650.29        | 493.21        | 493.21        | 0.00         | 0.00                       | 22.06        |
|         | <b>451.40</b> | <b>451.42</b> | <b>0.00</b>  | <b>7200.00</b> | <b>452.59</b> | <b>452.46</b> | <b>0.25</b>  | <b>0.21<sup>(11)</sup></b> | <b>322.76</b> | <b>451.43</b> | <b>451.40</b> | <b>0.01</b>  | <b>0.00<sup>(18)</sup></b> | <b>16.25</b> |
| VLD26-1 | 344.70        | 344.70        | 0.00         | 7200.00        | 344.97        | 344.97        | 0.08         | 0.08                       | 106.89        | 344.70        | 344.70        | 0.00         | 0.00                       | 7.60         |
| VLD26-2 | 414.97        | 414.97        | 0.00         | 7200.00        | 417.36        | 415.45        | 0.57         | 0.12                       | 110.17        | 414.97        | 414.97        | 0.00         | 0.00                       | 11.93        |
| VLD26-3 | 386.03        | 386.03        | 0.00         | 7200.00        | 386.05        | 386.05        | 0.00         | 0.00                       | 109.15        | 386.03        | 386.03        | 0.00         | 0.00                       | 9.03         |
| VLD31-1 | 406.19        | 406.19        | 0.00         | 7200.00        | 407.16        | 407.16        | 0.24         | 0.24                       | 166.33        | 406.19        | 406.19        | 0.00         | 0.00                       | 11.63        |
| VLD31-2 | 407.27        | 407.27        | 0.00         | 7200.00        | 407.27        | 407.27        | 0.00         | 0.00                       | 170.40        | 407.27        | 407.27        | 0.00         | 0.00                       | 10.35        |
| VLD31-3 | 401.43        | 401.43        | 0.00         | 7200.00        | 401.43        | 401.43        | 0.00         | 0.00                       | 181.80        | 401.43        | 401.43        | 0.00         | 0.00                       | 8.99         |
| VLD36-1 | 421.04        | 421.04        | 0.00         | 7200.00        | 421.04        | 421.04        | 0.00         | 0.00                       | 226.01        | 421.04        | 421.04        | 0.00         | 0.00                       | 12.05        |
| VLD36-2 | 414.01        | 414.01        | 0.00         | 7200.00        | 415.35        | 415.35        | 0.32         | 0.32                       | 232.88        | 414.01        | 414.01        | 0.00         | 0.00                       | 12.59        |
| VLD36-3 | 406.21        | 406.21        | 0.00         | 7200.00        | 407.88        | 406.44        | 0.41         | 0.06                       | 234.82        | 406.21        | 406.21        | 0.00         | 0.00                       | 12.87        |
| VLD41-1 | 459.25        | 459.79        | 0.12         | 7200.00        | 460.33        | 459.25        | 0.23         | 0.00                       | 331.93        | 459.25        | 459.25        | 0.00         | 0.00                       | 18.25        |
| VLD41-2 | 419.15        | 419.15        | 0.00         | 7200.00        | 420.32        | 420.32        | 0.28         | 0.28                       | 338.05        | 419.15        | 419.15        | 0.00         | 0.00                       | 26.60        |
| VLD41-3 | 450.69        | 450.69        | 0.00         | 7200.00        | 450.69        | 450.69        | 0.00         | 0.00                       | 323.29        | 450.69        | 450.69        | 0.00         | 0.00                       | 15.72        |
| VLD46-1 | 423.62        | 423.65        | 0.01         | 7200.00        | 425.48        | 425.48        | 0.44         | 0.44                       | 446.74        | 423.62        | 423.62        | 0.00         | 0.00                       | 20.85        |
| VLD46-2 | 490.50        | 490.50        | 0.00         | 7200.00        | 490.50        | 490.50        | 0.00         | 0.00                       | 440.85        | 490.50        | 490.50        | 0.00         | 0.00                       | 18.67        |
| VLD46-3 | 472.23        | 473.92        | 0.36         | 7200.00        | 473.92        | 473.92        | 0.36         | 0.36                       | 477.84        | 473.01        | 472.23        | 0.16         | 0.00                       | 21.06        |
| VLD51-1 | 493.89        | 493.89        | 0.00         | 7200.00        | 494.95        | 494.95        | 0.21         | 0.21                       | 626.69        | 493.89        | 493.89        | 0.00         | 0.00                       | 21.19        |
| VLD51-2 | 459.69        | 468.09        | 1.80         | 7200.00        | 464.93        | 464.93        | 1.13         | 1.13                       | 662.18        | 459.69        | 459.69        | 0.00         | 0.00                       | 27.00        |
| VLD51-3 | 488.37        | 505.82</      |              |                |               |               |              |                            |               |               |               |              |                            |              |



**Table 8** Comparison results of Model+, LBBD and TSIH for instance set Poi325 with  $n = 10$ 

|         |       | Model+        |               |             |               | LBBD          |               |             |                | TSIH          |               |             |
|---------|-------|---------------|---------------|-------------|---------------|---------------|---------------|-------------|----------------|---------------|---------------|-------------|
|         |       | UB            | LB            | gap(%)      | time(s)       | UB            | LB            | gap(%)      | time(s)        | UB            | UB*           | time(s)     |
| Regular | 10-1  | 220.49        | 220.49        | 0.00        | 51.81         | 220.49        | 220.49        | 0.00        | 139.77         | 220.49        | 220.49        | 4.10        |
|         | 10-2  | 221.04        | 221.04        | 0.00        | 10.22         | 221.04        | 221.04        | 0.00        | 6.28           | 221.04        | 221.04        | 4.00        |
|         | 10-3  | 223.33        | 223.33        | 0.00        | 280.47        | 223.33        | 223.33        | 0.00        | 1474.41        | 223.43        | 223.33        | 4.24        |
|         | 10-4  | 214.12        | 214.12        | 0.00        | 1609.17       | 214.12        | 164.49        | 23.18       | 7200.00        | 214.12        | 214.12        | 5.34        |
|         | 10-5  | 178.19        | 178.19        | 0.00        | 42.25         | 178.19        | 178.19        | 0.00        | 76.47          | 178.19        | 178.19        | 3.99        |
|         | 10-6  | 225.92        | 225.92        | 0.00        | 25.86         | 225.92        | 225.92        | 0.00        | 21.17          | 225.92        | 225.92        | 4.28        |
|         | 10-7  | 203.54        | 203.54        | 0.00        | 45.98         | 203.54        | 203.54        | 0.00        | 74.38          | 203.54        | 203.54        | 4.08        |
|         | 10-8  | 200.90        | 200.90        | 0.00        | 30.91         | 200.90        | 200.90        | 0.00        | 25.16          | 200.90        | 200.90        | 4.27        |
|         | 10-9  | 195.47        | 195.47        | 0.00        | 15.17         | 195.47        | 195.47        | 0.00        | 26.08          | 195.47        | 195.47        | 4.08        |
|         | 10-10 | 221.34        | 221.34        | 0.00        | 130.11        | 221.34        | 221.34        | 0.00        | 846.64         | 221.34        | 221.34        | 4.91        |
|         | 10-11 | 223.39        | 223.39        | 0.00        | 1146.78       | 223.39        | 173.00        | 22.56       | 7200.00        | 223.39        | 223.39        | 5.29        |
|         | 10-12 | 226.85        | 226.85        | 0.00        | 72.88         | 226.85        | 226.85        | 0.00        | 94.31          | 226.85        | 226.85        | 4.06        |
|         | 10-13 | 213.54        | 213.54        | 0.00        | 288.64        | 213.54        | 213.54        | 0.00        | 1083.53        | 213.54        | 213.54        | 4.63        |
|         | 10-14 | 224.24        | 224.24        | 0.00        | 186.14        | 224.24        | 224.24        | 0.00        | 481.28         | 224.24        | 224.24        | 4.71        |
|         | 10-15 | 210.14        | 210.14        | 0.00        | 98.06         | 210.14        | 210.14        | 0.00        | 589.84         | 210.14        | 210.14        | 4.21        |
|         | 10-16 | 238.09        | 238.09        | 0.00        | 43.11         | 238.09        | 238.09        | 0.00        | 14.52          | 238.09        | 238.09        | 3.80        |
|         | 10-17 | 229.16        | 229.16        | 0.00        | 245.20        | 229.16        | 229.16        | 0.00        | 767.94         | 229.16        | 229.16        | 4.57        |
|         | 10-18 | 239.32        | 239.32        | 0.00        | 527.86        | 239.32        | 239.32        | 0.00        | 3429.39        | 239.32        | 239.32        | 5.11        |
|         | 10-19 | 168.49        | 168.49        | 0.00        | 36.00         | 168.49        | 168.49        | 0.00        | 41.78          | 168.49        | 168.49        | 3.98        |
|         | 10-20 | 211.45        | 211.45        | 0.00        | 72.83         | 211.45        | 211.45        | 0.00        | 168.97         | 211.45        | 211.45        | 4.30        |
|         | 10-21 | 224.73        | 224.73        | 0.00        | 593.77        | 224.73        | 205.31        | 8.64        | 7200.00        | 224.73        | 224.73        | 4.71        |
|         | 10-22 | 224.49        | 224.49        | 0.00        | 574.59        | 224.49        | 224.49        | 0.00        | 4732.22        | 224.51        | 224.49        | 4.72        |
|         | 10-23 | 218.33        | 218.33        | 0.00        | 344.69        | 218.33        | 218.33        | 0.00        | 3253.88        | 218.33        | 218.33        | 4.62        |
|         | 10-24 | 233.25        | 233.25        | 0.00        | 135.67        | 233.25        | 233.25        | 0.00        | 125.98         | 233.25        | 233.25        | 4.39        |
|         | 10-25 | 153.80        | 153.80        | 0.00        | 24.48         | 153.80        | 153.80        | 0.00        | 58.11          | 153.80        | 153.80        | 4.05        |
|         |       | <b>213.74</b> | <b>213.74</b> | <b>0.00</b> | <b>265.31</b> | <b>213.74</b> | <b>208.97</b> | <b>2.18</b> | <b>1565.28</b> | <b>213.75</b> | <b>213.74</b> | <b>4.42</b> |
| Cluster | 10-1  | 243.34        | 243.34        | 0.00        | 103.30        | 243.34        | 243.34        | 0.00        | 6098.45        | 244.12        | 243.46        | 4.61        |
|         | 10-2  | 242.66        | 242.66        | 0.00        | 344.42        | 242.66        | 242.65        | 0.00        | 4422.92        | 242.66        | 242.66        | 5.65        |
|         | 10-3  | 248.62        | 248.62        | 0.00        | 362.36        | 248.62        | 234.05        | 5.86        | 7200.03        | 249.76        | 249.28        | 5.12        |
|         | 10-4  | 239.16        | 239.16        | 0.00        | 133.08        | 239.16        | 239.16        | 0.00        | 1980.19        | 239.65        | 239.16        | 5.28        |
|         | 10-5  | 257.12        | 257.12        | 0.00        | 238.03        | 257.12        | 257.12        | 0.00        | 5131.38        | 258.09        | 257.85        | 5.35        |
|         | 10-6  | 254.47        | 254.47        | 0.00        | 1370.61       | 254.47        | 221.82        | 12.83       | 7200.06        | 254.77        | 254.47        | 5.26        |
|         | 10-7  | 231.55        | 231.55        | 0.00        | 151.63        | 231.55        | 231.55        | 0.00        | 2482.94        | 232.72        | 232.72        | 4.74        |
|         | 10-8  | 238.43        | 238.43        | 0.00        | 274.58        | 238.43        | 238.43        | 0.00        | 2531.83        | 238.51        | 238.51        | 4.52        |
|         | 10-9  | 233.38        | 233.38        | 0.00        | 321.86        | 233.38        | 214.28        | 8.19        | 7200.08        | 234.10        | 233.81        | 4.90        |
|         | 10-10 | 245.51        | 245.51        | 0.00        | 147.28        | 245.51        | 245.51        | 0.00        | 4760.47        | 247.64        | 246.92        | 5.19        |
|         | 10-11 | 237.48        | 237.48        | 0.00        | 515.56        | 237.48        | 225.55        | 5.02        | 7200.03        | 237.68        | 237.48        | 4.97        |
|         | 10-12 | 231.16        | 231.16        | 0.00        | 357.33        | 231.16        | 225.34        | 2.52        | 7200.06        | 231.20        | 231.16        | 5.28        |
|         | 10-13 | 248.30        | 248.30        | 0.00        | 327.36        | 248.30        | 230.14        | 7.31        | 7200.09        | 248.85        | 248.36        | 5.62        |
|         | 10-14 | 251.33        | 251.33        | 0.00        | 270.22        | 251.33        | 251.33        | 0.00        | 3585.64        | 253.74        | 253.28        | 5.30        |
|         | 10-15 | 228.56        | 228.56        | 0.00        | 117.17        | 228.56        | 204.70        | 10.44       | 7200.12        | 228.93        | 228.56        | 5.14        |
|         | 10-16 | 239.38        | 239.38        | 0.00        | 206.22        | 239.38        | 239.38        | 0.00        | 2167.03        | 239.66        | 239.41        | 5.46        |
|         | 10-17 | 254.63        | 254.63        | 0.00        | 183.39        | 254.63        | 254.63        | 0.00        | 2257.53        | 255.94        | 255.26        | 5.63        |
|         | 10-18 | 241.34        | 241.34        | 0.00        | 262.20        | 241.34        | 241.34        | 0.00        | 4999.78        | 241.42        | 241.34        | 5.62        |
|         | 10-19 | 248.84        | 248.84        | 0.00        | 176.61        | 248.84        | 248.84        | 0.00        | 4576.47        | 249.20        | 248.91        | 5.00        |
|         | 10-20 | 249.64        | 249.64        | 0.00        | 227.59        | 249.64        | 249.64        | 0.00        | 4705.59        | 252.38        | 250.20        | 5.49        |
|         | 10-21 | 237.31        | 237.31        | 0.00        | 188.30        | 237.31        | 237.31        | 0.00        | 4838.28        | 237.93        | 237.31        | 5.54        |
|         | 10-22 | 232.79        | 232.79        | 0.00        | 500.23        | 232.79        | 232.79        | 0.00        | 5012.47        | 233.16        | 232.79        | 5.89        |
|         | 10-23 | 253.20        | 253.20        | 0.00        | 504.38        | 253.20        | 253.20        | 0.00        | 4626.03        | 253.44        | 253.20        | 5.73        |
|         | 10-24 | 232.03        | 232.03        | 0.00        | 227.17        | 232.03        | 216.74        | 6.59        | 7200.12        | 232.33        | 232.15        | 6.20        |
|         | 10-25 | 232.44        | 232.44        | 0.00        | 123.66        | 232.44        | 232.44        | 0.00        | 2558.77        | 232.66        | 232.65        | 4.97        |
|         |       | <b>242.11</b> | <b>242.11</b> | <b>0.00</b> | <b>305.38</b> | <b>242.11</b> | <b>236.45</b> | <b>2.35</b> | <b>4973.45</b> | <b>242.82</b> | <b>242.44</b> | <b>5.30</b> |

**Table 9 Comparison results of Model+, LBB and TSIH for instance set Poi325 with  $n = 15$** 

|         |       | Model+        |               |              |                | LBB           |               |              |                | TSIH          |               |             |
|---------|-------|---------------|---------------|--------------|----------------|---------------|---------------|--------------|----------------|---------------|---------------|-------------|
|         |       | UB            | LB            | gap(%)       | time(s)        | UB            | LB            | gap(%)       | time(s)        | UB            | UB*           | time(s)     |
| Regular | 15-1  | 244.02        | 194.83        | 20.16        | 7200.00        | 244.02        | 124.55        | 48.96        | 7200.00        | 244.02        | 244.02        | 5.73        |
|         | 15-2  | 253.32        | 223.19        | 11.89        | 7200.00        | 253.32        | 149.07        | 41.15        | 7200.00        | 254.99        | 253.32        | 5.49        |
|         | 15-3  | 277.46        | 200.20        | 27.85        | 7200.00        | 277.46        | 130.56        | 52.95        | 7200.00        | 277.46        | 277.46        | 5.66        |
|         | 15-4  | 225.20        | 191.02        | 15.18        | 7200.00        | 225.20        | 117.84        | 47.67        | 7200.00        | 225.71        | 225.20        | 5.60        |
|         | 15-5  | 230.01        | 230.01        | 0.00         | 3076.36        | 230.01        | 161.62        | 29.73        | 7200.00        | 230.01        | 230.01        | 4.89        |
|         | 15-6  | 242.04        | 209.04        | 13.63        | 7200.00        | 242.04        | 154.93        | 35.99        | 7200.00        | 242.04        | 242.04        | 5.32        |
|         | 15-7  | 213.83        | 177.68        | 16.91        | 7200.00        | 213.83        | 117.22        | 45.18        | 7200.00        | 214.17        | 213.83        | 5.06        |
|         | 15-8  | 200.58        | 176.28        | 12.12        | 7200.00        | 200.58        | 114.11        | 43.11        | 7200.00        | 201.20        | 200.58        | 5.29        |
|         | 15-9  | 258.77        | 205.47        | 20.60        | 7200.00        | 258.77        | 139.64        | 46.04        | 7200.00        | 259.84        | 259.16        | 5.75        |
|         | 15-10 | 224.05        | 196.71        | 12.20        | 7200.00        | 224.05        | 134.99        | 39.75        | 7200.00        | 224.08        | 224.05        | 5.86        |
|         | 15-11 | 238.01        | 199.83        | 16.04        | 7200.00        | 238.01        | 153.73        | 35.41        | 7200.00        | 238.05        | 238.03        | 5.97        |
|         | 15-12 | 281.38        | 218.17        | 22.46        | 7200.00        | 281.38        | 154.82        | 44.98        | 7200.00        | 281.50        | 281.38        | 5.80        |
|         | 15-13 | 246.84        | 246.84        | 0.00         | 6281.02        | 246.84        | 150.18        | 39.16        | 7200.00        | 246.85        | 246.84        | 5.53        |
|         | 15-14 | 235.34        | 183.82        | 21.89        | 7200.00        | 235.34        | 145.84        | 38.03        | 7200.00        | 235.38        | 235.34        | 5.52        |
|         | 15-15 | 194.94        | 175.15        | 10.15        | 7200.00        | 194.94        | 101.99        | 47.68        | 7200.00        | 194.94        | 194.94        | 5.13        |
|         | 15-16 | 266.79        | 266.79        | 0.00         | 4921.80        | 266.79        | 177.02        | 33.65        | 7200.00        | 266.93        | 266.93        | 5.42        |
|         | 15-17 | 222.20        | 222.20        | 0.00         | 4706.95        | 222.20        | 137.53        | 38.11        | 7200.00        | 222.20        | 222.20        | 4.78        |
|         | 15-18 | 232.40        | 203.92        | 12.26        | 7200.00        | 232.40        | 147.73        | 36.43        | 7200.00        | 232.40        | 232.40        | 5.22        |
|         | 15-19 | 277.48        | 244.00        | 12.06        | 7200.00        | 277.48        | 202.92        | 26.87        | 7200.00        | 277.52        | 277.48        | 6.06        |
|         | 15-20 | 261.59        | 212.14        | 18.90        | 7200.00        | 261.59        | 142.48        | 45.53        | 7200.00        | 262.07        | 261.59        | 6.08        |
|         | 15-21 | 245.73        | 213.70        | 13.03        | 7200.00        | 245.73        | 147.27        | 40.07        | 7200.00        | 245.73        | 245.73        | 4.99        |
|         | 15-22 | 200.84        | 200.84        | 0.00         | 1594.16        | 200.84        | 127.74        | 36.40        | 7200.00        | 200.84        | 200.84        | 5.03        |
|         | 15-23 | 249.90        | 224.47        | 10.17        | 7200.00        | 249.90        | 155.15        | 37.91        | 7200.00        | 249.90        | 249.90        | 5.90        |
|         | 15-24 | 245.51        | 245.51        | 0.00         | 5542.70        | 245.51        | 165.25        | 32.69        | 7200.00        | 245.51        | 245.51        | 4.88        |
|         | 15-25 | 250.26        | 216.78        | 13.38        | 7200.00        | 250.26        | 138.70        | 44.58        | 7200.00        | 251.06        | 250.26        | 6.22        |
|         |       | <b>240.74</b> | <b>211.14</b> | <b>12.04</b> | <b>6516.92</b> | <b>240.74</b> | <b>143.72</b> | <b>40.32</b> | <b>7200.00</b> | <b>240.97</b> | <b>240.76</b> | <b>5.49</b> |
| Cluster | 15-1  | 268.67        | 195.90        | 27.08        | 7200.00        | 266.66        | 165.46        | 37.95        | 7200.00        | 269.63        | 269.16        | 7.16        |
|         | 15-2  | 253.06        | 182.48        | 27.89        | 7200.00        | 252.89        | 155.16        | 38.64        | 7200.00        | 254.25        | 253.06        | 7.69        |
|         | 15-3  | 255.45        | 186.42        | 27.03        | 7200.00        | 254.67        | 158.71        | 37.68        | 7200.00        | 256.53        | 255.45        | 7.92        |
|         | 15-4  | 247.00        | 168.01        | 31.98        | 7200.00        | 246.54        | 154.99        | 37.14        | 7200.00        | 248.78        | 247.00        | 6.24        |
|         | 15-5  | 255.90        | 186.18        | 27.25        | 7200.00        | 254.16        | 150.62        | 40.74        | 7200.00        | 256.64        | 255.90        | 7.29        |
|         | 15-6  | 252.15        | 189.93        | 24.68        | 7200.00        | 251.65        | 161.41        | 35.86        | 7200.00        | 252.36        | 252.15        | 7.84        |
|         | 15-7  | 248.64        | 194.11        | 21.93        | 7200.00        | 248.56        | 167.08        | 32.78        | 7200.00        | 249.32        | 248.64        | 8.81        |
|         | 15-8  | 252.53        | 184.85        | 26.80        | 7200.00        | 251.67        | 159.84        | 36.49        | 7200.00        | 254.08        | 252.53        | 7.52        |
|         | 15-9  | 256.80        | 210.72        | 17.95        | 7200.00        | 257.91        | 147.68        | 42.74        | 7200.00        | 260.31        | 259.57        | 7.60        |
|         | 15-10 | 256.37        | 204.78        | 20.12        | 7200.00        | 255.85        | 166.74        | 34.83        | 7200.00        | 256.80        | 256.37        | 7.47        |
|         | 15-11 | 266.33        | 215.78        | 18.98        | 7200.00        | 267.09        | 182.04        | 31.85        | 7200.00        | 267.42        | 267.09        | 6.26        |
|         | 15-12 | 247.60        | 173.54        | 29.91        | 7200.00        | 247.60        | 150.92        | 39.05        | 7200.00        | 252.15        | 251.54        | 7.48        |
|         | 15-13 | 253.41        | 218.33        | 13.84        | 7200.00        | 253.40        | 181.12        | 28.52        | 7200.00        | 253.50        | 253.41        | 6.93        |
|         | 15-14 | 246.31        | 186.90        | 24.12        | 7200.00        | 246.21        | 161.95        | 34.22        | 7200.00        | 249.38        | 248.17        | 8.07        |
|         | 15-15 | 250.06        | 169.11        | 32.37        | 7200.00        | 249.62        | 150.53        | 39.70        | 7200.00        | 250.55        | 250.06        | 7.06        |
|         | 15-16 | 253.60        | 201.13        | 20.69        | 7200.00        | 253.13        | 173.54        | 31.44        | 7200.00        | 254.35        | 253.60        | 7.60        |
|         | 15-17 | 255.42        | 188.20        | 26.32        | 7200.00        | 254.54        | 161.14        | 36.69        | 7200.00        | 256.40        | 255.42        | 7.05        |
|         | 15-18 | 266.52        | 199.95        | 24.98        | 7200.00        | 266.51        | 188.67        | 29.21        | 7200.00        | 266.66        | 266.52        | 6.98        |
|         | 15-19 | 243.06        | 190.38        | 21.68        | 7200.00        | 242.90        | 171.27        | 29.49        | 7200.00        | 243.26        | 243.06        | 6.09        |
|         | 15-20 | 253.33        | 203.02        | 19.86        | 7200.00        | 253.30        | 182.97        | 27.77        | 7200.00        | 253.64        | 253.49        | 6.08        |
|         | 15-21 | 240.39        | 207.40        | 13.72        | 7200.00        | 240.39        | 167.46        | 30.34        | 7200.00        | 242.36        | 241.55        | 7.37        |
|         | 15-22 | 244.57        | 198.23        | 18.95        | 7200.00        | 244.21        | 164.88        | 32.49        | 7200.00        | 244.92        | 244.57        | 6.45        |
|         | 15-23 | 260.50        | 183.69        | 29.49        | 7200.00        | 258.77        | 152.13        | 41.21        | 7200.00        | 260.64        | 260.13        | 7.44        |
|         | 15-24 | 253.66        | 181.91        | 28.29        | 7200.00        | 252.77        | 156.90        | 37.93        | 7200.00        | 254.57        | 253.66        | 7.24        |
|         | 15-25 | 255.13        | 218.46        | 14.37        | 7200.00        | 255.13        | 190.93        | 25.16        | 7200.00        | 256.60        | 255.90        | 7.52        |
|         |       | <b>253.46</b> | <b>193.85</b> | <b>23.61</b> | <b>7200.00</b> | <b>253.05</b> | <b>164.96</b> | <b>34.80</b> | <b>7200.00</b> | <b>254.60</b> | <b>253.92</b> | <b>7.25</b> |

**Table 10** Comparison results of Model+, LBBD and TSIH for instance set Poi325 with  $n = 20$ 

|         |       | Model+        |               |              |                | LBBD          |               |              |                | TSIH          |               |             |
|---------|-------|---------------|---------------|--------------|----------------|---------------|---------------|--------------|----------------|---------------|---------------|-------------|
|         |       | UB            | LB            | gap(%)       | time(s)        | UB            | LB            | gap(%)       | time(s)        | UB            | UB*           | time(s)     |
| Regular | 20-1  | 280.53        | 212.25        | 24.34        | 7200.00        | 280.53        | 126.33        | 54.97        | 7200.00        | 280.58        | 280.53        | 6.49        |
|         | 20-2  | 229.01        | 186.43        | 18.59        | 7200.00        | 229.01        | 109.37        | 52.24        | 7200.00        | 229.01        | 229.01        | 6.32        |
|         | 20-3  | 267.89        | 218.50        | 18.44        | 7200.00        | 267.89        | 127.47        | 52.42        | 7200.00        | 268.18        | 267.89        | 7.05        |
|         | 20-4  | 249.35        | 198.79        | 20.28        | 7200.00        | 249.35        | 103.96        | 58.31        | 7200.00        | 249.79        | 249.35        | 6.52        |
|         | 20-5  | 295.74        | 226.97        | 23.25        | 7200.00        | 295.32        | 123.25        | 58.26        | 7200.00        | 296.91        | 295.74        | 7.27        |
|         | 20-6  | 266.26        | 207.48        | 22.08        | 7200.00        | 266.26        | 107.39        | 59.67        | 7200.00        | 270.73        | 269.80        | 6.39        |
|         | 20-7  | 253.40        | 201.47        | 20.49        | 7200.00        | 251.90        | 93.51         | 62.88        | 7200.00        | 255.33        | 253.40        | 7.00        |
|         | 20-8  | 245.22        | 210.87        | 14.01        | 7200.00        | 245.22        | 110.78        | 54.83        | 7200.00        | 245.50        | 245.22        | 6.51        |
|         | 20-9  | 278.36        | 238.45        | 14.34        | 7200.00        | 278.36        | 150.81        | 45.82        | 7200.00        | 281.90        | 279.20        | 6.12        |
|         | 20-10 | 266.80        | 196.81        | 26.23        | 7200.00        | 266.16        | 107.74        | 59.52        | 7200.00        | 266.94        | 266.80        | 6.06        |
|         | 20-11 | 226.83        | 191.79        | 15.45        | 7200.00        | 226.83        | 84.63         | 62.69        | 7200.00        | 227.41        | 227.14        | 6.27        |
|         | 20-12 | 272.29        | 185.33        | 31.94        | 7200.00        | 272.29        | 98.59         | 63.79        | 7200.00        | 272.29        | 272.29        | 6.29        |
|         | 20-13 | 229.89        | 192.41        | 16.30        | 7200.00        | 229.89        | 81.60         | 64.51        | 7200.00        | 233.57        | 232.87        | 6.38        |
|         | 20-14 | 267.67        | 217.06        | 18.91        | 7200.00        | 268.03        | 126.32        | 52.87        | 7200.00        | 268.03        | 268.03        | 7.00        |
|         | 20-15 | 262.38        | 194.25        | 25.97        | 7200.00        | 262.38        | 93.05         | 64.54        | 7200.00        | 262.38        | 262.38        | 6.05        |
|         | 20-16 | 270.99        | 193.76        | 28.50        | 7200.00        | 270.85        | 102.75        | 62.06        | 7200.00        | 271.24        | 270.99        | 6.05        |
|         | 20-17 | 239.42        | 177.04        | 26.05        | 7200.00        | 239.42        | 80.18         | 66.51        | 7200.00        | 239.42        | 239.42        | 6.63        |
|         | 20-18 | 287.85        | 224.90        | 21.87        | 7200.00        | 287.85        | 140.71        | 51.12        | 7200.00        | 288.35        | 287.85        | 5.94        |
|         | 20-19 | 235.15        | 194.34        | 17.35        | 7200.00        | 235.09        | 95.94         | 59.19        | 7200.00        | 235.68        | 235.15        | 6.58        |
|         | 20-20 | 297.94        | 237.00        | 20.46        | 7200.00        | 297.57        | 129.16        | 56.59        | 7200.00        | 298.32        | 297.94        | 6.00        |
|         | 20-21 | 273.69        | 198.99        | 27.29        | 7200.00        | 273.69        | 107.40        | 60.76        | 7200.00        | 273.69        | 273.69        | 6.37        |
|         | 20-22 | 255.40        | 218.07        | 14.62        | 7200.00        | 255.40        | 129.19        | 49.42        | 7200.00        | 255.63        | 255.62        | 6.33        |
|         | 20-23 | 286.31        | 217.04        | 24.19        | 7200.00        | 286.31        | 113.50        | 60.36        | 7200.00        | 289.29        | 288.55        | 6.59        |
|         | 20-24 | 213.94        | 179.45        | 16.12        | 7200.00        | 213.72        | 89.20         | 58.26        | 7200.00        | 214.92        | 214.68        | 6.59        |
|         | 20-25 | 260.28        | 212.14        | 18.49        | 7200.00        | 260.28        | 111.69        | 57.09        | 7200.00        | 260.68        | 260.68        | 6.17        |
|         |       | <b>260.50</b> | <b>205.26</b> | <b>21.02</b> | <b>7200.00</b> | <b>260.38</b> | <b>109.78</b> | <b>57.95</b> | <b>7200.00</b> | <b>261.43</b> | <b>260.97</b> | <b>6.44</b> |
| Cluster | 20-1  | 262.09        | 170.40        | 34.99        | 7200.00        | 261.52        | 140.33        | 46.34        | 7200.00        | 262.41        | 262.09        | 6.95        |
|         | 20-2  | 260.39        | 178.16        | 31.58        | 7200.00        | 259.23        | 148.60        | 42.68        | 7200.00        | 261.02        | 260.39        | 7.12        |
|         | 20-3  | 268.77        | 170.62        | 36.52        | 7200.00        | 266.90        | 140.85        | 47.23        | 7200.00        | 269.81        | 268.77        | 7.10        |
|         | 20-4  | 258.50        | 173.29        | 32.96        | 7200.00        | 257.93        | 141.10        | 45.29        | 7200.00        | 259.37        | 258.50        | 7.98        |
|         | 20-5  | 266.12        | 190.87        | 28.28        | 7200.00        | 265.58        | 149.56        | 43.68        | 7200.00        | 266.80        | 266.12        | 7.26        |
|         | 20-6  | 260.46        | 171.00        | 34.35        | 7200.00        | 258.96        | 138.37        | 46.57        | 7200.00        | 260.96        | 260.46        | 6.64        |
|         | 20-7  | 255.90        | 172.60        | 32.55        | 7200.00        | 253.90        | 140.50        | 44.66        | 7200.00        | 256.64        | 255.90        | 7.81        |
|         | 20-8  | 259.06        | 187.10        | 27.78        | 7200.00        | 257.69        | 144.54        | 43.91        | 7200.00        | 259.17        | 259.06        | 7.32        |
|         | 20-9  | 259.92        | 203.06        | 21.88        | 7200.00        | 259.01        | 156.13        | 39.72        | 7200.00        | 260.74        | 259.92        | 7.54        |
|         | 20-10 | 266.61        | 174.20        | 34.66        | 7200.00        | 266.17        | 136.33        | 48.78        | 7200.00        | 267.16        | 266.60        | 8.50        |
|         | 20-11 | 269.59        | 197.20        | 26.85        | 7200.00        | 269.23        | 154.96        | 42.44        | 7200.00        | 270.17        | 269.59        | 6.68        |
|         | 20-12 | 253.57        | 182.56        | 28.00        | 7200.00        | 253.41        | 154.82        | 38.90        | 7200.00        | 253.84        | 253.57        | 7.59        |
|         | 20-13 | 252.42        | 188.04        | 25.51        | 7200.00        | 252.39        | 143.86        | 43.00        | 7200.00        | 252.53        | 252.42        | 7.15        |
|         | 20-14 | 260.04        | 188.83        | 27.39        | 7200.00        | 259.10        | 157.91        | 39.05        | 7200.00        | 261.51        | 260.04        | 8.23        |
|         | 20-15 | 271.26        | 183.75        | 32.26        | 7200.00        | 271.14        | 147.17        | 45.72        | 7200.00        | 271.32        | 271.26        | 7.68        |
|         | 20-16 | 266.32        | 183.32        | 31.17        | 7200.00        | 264.84        | 143.39        | 45.86        | 7200.00        | 267.47        | 266.32        | 7.10        |
|         | 20-17 | 257.98        | 183.63        | 28.82        | 7200.00        | 256.23        | 140.95        | 44.99        | 7200.00        | 259.12        | 257.98        | 7.42        |
|         | 20-18 | 253.09        | 158.43        | 37.40        | 7200.00        | 251.66        | 129.76        | 48.44        | 7200.00        | 253.84        | 253.09        | 7.27        |
|         | 20-19 | 263.30        | 176.15        | 33.10        | 7200.00        | 261.82        | 150.68        | 42.45        | 7200.00        | 264.50        | 263.30        | 7.26        |
|         | 20-20 | 262.70        | 181.54        | 30.89        | 7200.00        | 261.19        | 140.09        | 46.37        | 7200.00        | 263.65        | 262.70        | 7.16        |
|         | 20-21 | 263.51        | 182.70        | 30.67        | 7200.00        | 261.29        | 146.67        | 43.87        | 7200.00        | 264.46        | 263.51        | 6.83        |
|         | 20-22 | 260.64        | 182.57        | 29.95        | 7200.00        | 258.92        | 152.21        | 41.21        | 7200.00        | 262.02        | 260.64        | 7.58        |
|         | 20-23 | 262.85        | 166.59        | 36.62        | 7200.00        | 262.29        | 142.31        | 45.74        | 7200.00        | 263.43        | 262.85        | 7.01        |
|         | 20-24 | 257.27        | 184.39        | 28.33        | 7200.00        | 255.98        | 143.56        | 43.92        | 7200.00        | 257.71        | 257.27        | 7.12        |
|         | 20-25 | 262.11        | 183.90        | 29.84        | 7200.00        | 262.54        | 155.78        | 40.66        | 7200.00        | 263.67        | 263.23        | 7.53        |
|         |       | <b>261.38</b> | <b>180.60</b> | <b>30.89</b> | <b>7200.00</b> | <b>260.36</b> | <b>145.62</b> | <b>44.06</b> | <b>7200.00</b> | <b>262.13</b> | <b>261.42</b> | <b>7.35</b> |

**Table 11** Comparison results of Model+, LBBD and TSIH for instance set Poi325 with  $n = 30$ 

|         |       | Model+        |               |              |                | LBBD          |               |              |                | TSIH          |               |              |
|---------|-------|---------------|---------------|--------------|----------------|---------------|---------------|--------------|----------------|---------------|---------------|--------------|
|         |       | UB            | LB            | gap(%)       | time(s)        | UB            | LB            | gap(%)       | time(s)        | UB            | UB*           | time(s)      |
| Regular | 30-1  | 307.09        | 240.66        | 21.63        | 7200.00        | 306.15        | 85.26         | 72.15        | 7200.00        | 308.11        | 307.09        | 11.63        |
|         | 30-2  | 323.45        | 234.74        | 27.42        | 7200.00        | 321.04        | 82.00         | 74.46        | 7200.00        | 324.49        | 323.45        | 10.68        |
|         | 30-3  | 285.39        | 220.65        | 22.68        | 7200.00        | 284.86        | 64.82         | 77.25        | 7200.00        | 285.99        | 285.39        | 11.10        |
|         | 30-4  | 288.59        | 220.40        | 23.63        | 7200.00        | 288.25        | 70.30         | 75.61        | 7200.00        | 288.95        | 288.59        | 9.72         |
|         | 30-5  | 269.77        | 219.83        | 18.51        | 7200.00        | 268.79        | 72.39         | 73.07        | 7200.00        | 269.84        | 269.77        | 10.30        |
|         | 30-6  | 315.23        | 239.40        | 24.05        | 7200.00        | 313.96        | 71.73         | 77.15        | 7200.00        | 317.96        | 315.23        | 10.26        |
|         | 30-7  | 297.77        | 234.46        | 21.26        | 7200.00        | 296.66        | 83.50         | 71.85        | 7200.00        | 299.17        | 297.90        | 10.46        |
|         | 30-8  | 299.78        | 242.05        | 19.26        | 7200.00        | 299.57        | 100.79        | 66.35        | 7200.00        | 300.73        | 299.78        | 9.65         |
|         | 30-9  | 317.13        | 241.78        | 23.76        | 7200.00        | 315.93        | 89.56         | 71.65        | 7200.00        | 318.08        | 317.13        | 9.69         |
|         | 30-10 | 261.56        | 206.46        | 21.07        | 7200.00        | 260.32        | 62.37         | 76.04        | 7200.00        | 262.88        | 261.56        | 9.18         |
|         | 30-11 | 309.16        | 265.54        | 14.11        | 7200.00        | 309.13        | 89.96         | 70.90        | 7200.00        | 309.98        | 309.16        | 9.91         |
|         | 30-12 | 323.16        | 257.93        | 20.19        | 7200.00        | 323.16        | 89.18         | 72.40        | 7200.00        | 323.16        | 323.16        | 9.79         |
|         | 30-13 | 289.86        | 220.68        | 23.87        | 7200.00        | 287.71        | 80.79         | 71.92        | 7200.00        | 290.79        | 289.86        | 12.08        |
|         | 30-14 | 294.24        | 231.40        | 21.36        | 7200.00        | 294.24        | 67.50         | 77.06        | 7200.00        | 298.51        | 294.24        | 10.88        |
|         | 30-15 | 276.87        | 232.64        | 15.98        | 7200.00        | 276.87        | 77.20         | 72.12        | 7200.00        | 277.96        | 276.87        | 9.01         |
|         | 30-16 | 269.23        | 224.83        | 16.49        | 7200.00        | 269.23        | 69.02         | 74.36        | 7200.00        | 269.23        | 269.23        | 10.27        |
|         | 30-17 | 292.57        | 226.12        | 22.71        | 7200.00        | 292.25        | 88.02         | 69.88        | 7200.00        | 293.02        | 292.57        | 10.38        |
|         | 30-18 | 300.15        | 254.44        | 15.23        | 7200.00        | 300.15        | 89.45         | 70.20        | 7200.00        | 302.05        | 300.15        | 10.28        |
|         | 30-19 | 249.35        | 207.60        | 16.74        | 7200.00        | 247.16        | 57.25         | 76.84        | 7200.00        | 249.67        | 249.35        | 9.84         |
|         | 30-20 | 312.34        | 236.61        | 24.25        | 7200.00        | 312.34        | 88.04         | 71.81        | 7200.00        | 312.52        | 312.34        | 9.93         |
|         | 30-21 | 308.59        | 235.23        | 23.77        | 7200.00        | 307.97        | 72.18         | 76.56        | 7200.00        | 309.35        | 308.59        | 10.03        |
|         | 30-22 | 271.96        | 239.37        | 11.98        | 7200.00        | 271.96        | 71.24         | 73.81        | 7200.00        | 274.15        | 271.96        | 9.64         |
|         | 30-23 | 293.41        | 207.67        | 29.22        | 7200.00        | 292.99        | 73.15         | 75.03        | 7200.00        | 293.79        | 293.41        | 10.19        |
|         | 30-24 | 258.11        | 191.26        | 25.90        | 7200.00        | 257.18        | 63.48         | 75.32        | 7200.00        | 258.63        | 258.11        | 10.54        |
|         | 30-25 | 268.24        | 216.39        | 19.33        | 7200.00        | 268.24        | 64.79         | 75.85        | 7200.00        | 268.75        | 268.24        | 9.57         |
|         |       | <b>291.32</b> | <b>229.92</b> | <b>20.98</b> | <b>7200.00</b> | <b>290.64</b> | <b>76.96</b>  | <b>73.59</b> | <b>7200.00</b> | <b>292.31</b> | <b>291.33</b> | <b>10.20</b> |
| Cluster | 30-1  | 267.40        | 186.03        | 30.43        | 7200.00        | 267.16        | 140.03        | 47.59        | 7200.00        | 268.48        | 267.40        | 9.72         |
|         | 30-2  | 268.21        | 187.93        | 29.93        | 7200.00        | 264.76        | 135.25        | 48.92        | 7200.00        | 268.73        | 268.21        | 9.91         |
|         | 30-3  | 266.09        | 183.74        | 30.95        | 7200.00        | 265.06        | 126.52        | 52.27        | 7200.00        | 266.87        | 266.09        | 10.68        |
|         | 30-4  | 277.41        | 191.92        | 30.82        | 7200.00        | 275.82        | 132.13        | 52.10        | 7200.00        | 279.01        | 277.41        | 11.48        |
|         | 30-5  | 281.76        | 190.35        | 32.44        | 7200.00        | 281.38        | 131.18        | 53.38        | 7200.00        | 283.11        | 281.76        | 10.54        |
|         | 30-6  | 266.91        | 186.01        | 30.31        | 7200.00        | 266.44        | 131.99        | 50.46        | 7200.00        | 267.49        | 267.19        | 9.12         |
|         | 30-7  | 266.98        | 180.02        | 32.57        | 7200.00        | 266.95        | 129.31        | 51.56        | 7200.00        | 267.36        | 266.98        | 10.74        |
|         | 30-8  | 273.99        | 189.55        | 30.82        | 7200.00        | 272.48        | 130.64        | 52.06        | 7200.00        | 274.32        | 273.99        | 10.01        |
|         | 30-9  | 264.01        | 185.85        | 29.60        | 7200.00        | 262.71        | 132.04        | 49.74        | 7200.00        | 264.76        | 264.01        | 10.80        |
|         | 30-10 | 277.66        | 192.75        | 30.58        | 7200.00        | 276.14        | 138.51        | 49.84        | 7200.00        | 278.76        | 277.66        | 10.17        |
|         | 30-11 | 269.45        | 183.68        | 31.83        | 7200.00        | 268.18        | 133.23        | 50.32        | 7200.00        | 271.00        | 269.45        | 9.91         |
|         | 30-12 | 272.12        | 184.66        | 32.14        | 7200.00        | 271.54        | 133.48        | 50.84        | 7200.00        | 272.66        | 272.12        | 9.20         |
|         | 30-13 | 277.33        | 195.14        | 29.64        | 7200.00        | 276.71        | 140.08        | 49.37        | 7200.00        | 277.67        | 277.33        | 10.11        |
|         | 30-14 | 276.88        | 202.23        | 26.96        | 7200.00        | 275.24        | 144.79        | 47.39        | 7200.00        | 278.02        | 276.88        | 10.60        |
|         | 30-15 | 276.40        | 191.73        | 30.63        | 7200.00        | 275.95        | 134.31        | 51.33        | 7200.00        | 276.77        | 276.40        | 10.59        |
|         | 30-16 | 273.43        | 172.14        | 37.05        | 7200.00        | 271.65        | 130.55        | 51.94        | 7200.00        | 274.00        | 273.43        | 9.32         |
|         | 30-17 | 276.57        | 190.05        | 31.28        | 7200.00        | 274.13        | 132.51        | 51.66        | 7200.00        | 278.48        | 276.57        | 9.48         |
|         | 30-18 | 267.89        | 188.79        | 29.53        | 7200.00        | 267.03        | 130.66        | 51.07        | 7200.00        | 269.59        | 267.89        | 10.80        |
|         | 30-19 | 275.58        | 179.04        | 35.03        | 7200.00        | 275.18        | 130.60        | 52.54        | 7200.00        | 276.47        | 275.58        | 9.73         |
|         | 30-20 | 274.99        | 198.24        | 27.91        | 7200.00        | 273.72        | 140.31        | 48.74        | 7200.00        | 275.54        | 274.99        | 10.43        |
|         | 30-21 | 277.32        | 181.85        | 34.42        | 7200.00        | 276.57        | 132.44        | 52.11        | 7200.00        | 278.12        | 277.32        | 9.29         |
|         | 30-22 | 271.35        | 190.11        | 29.94        | 7200.00        | 270.33        | 131.22        | 51.46        | 7200.00        | 272.07        | 271.35        | 10.67        |
|         | 30-23 | 270.36        | 193.48        | 28.44        | 7200.00        | 266.60        | 135.71        | 49.10        | 7200.00        | 271.46        | 270.36        | 9.59         |
|         | 30-24 | 274.65        | 189.26        | 31.09        | 7200.00        | 273.60        | 132.71        | 51.50        | 7200.00        | 274.81        | 274.65        | 9.74         |
|         | 30-25 | 273.46        | 189.65        | 30.65        | 7200.00        | 273.22        | 139.51        | 48.94        | 7200.00        | 274.21        | 273.46        | 10.96        |
|         |       | <b>272.73</b> | <b>188.17</b> | <b>31.00</b> | <b>7200.00</b> | <b>271.54</b> | <b>133.99</b> | <b>50.65</b> | <b>7200.00</b> | <b>273.59</b> | <b>272.74</b> | <b>10.14</b> |

**Table 12** Comparison results of Model+, LBBD and TSIH for instance set Poi325 with  $n = 50$ 

|         |       | Model+        |               |              |                | LBBD          |               |              |                | TSIH          |               |              |
|---------|-------|---------------|---------------|--------------|----------------|---------------|---------------|--------------|----------------|---------------|---------------|--------------|
|         |       | UB            | LB            | gap(%)       | time(s)        | UB            | LB            | gap(%)       | time(s)        | UB            | UB*           | time(s)      |
| Regular | 50-1  | 359.39        | 280.03        | 22.08        | 7200.00        | 358.63        | 60.02         | 83.26        | 7200.00        | 360.14        | 359.39        | 20.46        |
|         | 50-2  | 372.33        | 273.76        | 26.47        | 7200.00        | 371.85        | 66.86         | 82.02        | 7200.00        | 372.66        | 372.33        | 18.47        |
|         | 50-3  | 333.87        | 258.70        | 22.51        | 7200.00        | 332.53        | 51.69         | 84.45        | 7200.00        | 333.93        | 333.87        | 18.59        |
|         | 50-4  | 360.69        | 281.11        | 22.06        | 7200.00        | 360.32        | 53.77         | 85.08        | 7200.00        | 361.92        | 360.69        | 19.27        |
|         | 50-5  | 350.57        | 299.26        | 14.64        | 7200.00        | 350.10        | 59.69         | 82.95        | 7200.00        | 351.61        | 350.57        | 18.76        |
|         | 50-6  | 356.56        | 284.64        | 20.17        | 7200.00        | 353.26        | 55.63         | 84.25        | 7200.00        | 359.82        | 356.56        | 18.65        |
|         | 50-7  | 367.41        | 287.82        | 21.66        | 7200.00        | 365.19        | 55.24         | 84.87        | 7200.00        | 369.03        | 367.41        | 17.43        |
|         | 50-8  | 331.67        | 272.27        | 17.91        | 7200.00        | 331.67        | 52.37         | 84.21        | 7200.00        | 332.94        | 331.67        | 20.10        |
|         | 50-9  | 362.19        | 276.72        | 23.60        | 7200.00        | 361.68        | 58.51         | 83.82        | 7200.00        | 362.98        | 362.19        | 19.54        |
|         | 50-10 | 339.09        | 263.06        | 22.42        | 7200.00        | 338.29        | 49.60         | 85.34        | 7200.00        | 340.67        | 339.09        | 16.33        |
|         | 50-11 | 347.72        | 273.98        | 21.21        | 7200.00        | 345.88        | 53.00         | 84.68        | 7200.00        | 349.57        | 347.72        | 21.14        |
|         | 50-12 | 372.39        | 292.09        | 21.56        | 7200.00        | 369.64        | 59.42         | 83.92        | 7200.00        | 375.00        | 372.39        | 19.59        |
|         | 50-13 | 363.98        | 303.03        | 16.74        | 7200.00        | 363.98        | 61.26         | 83.17        | 7200.00        | 364.56        | 363.98        | 17.76        |
|         | 50-14 | 361.87        | 287.03        | 20.68        | 7200.00        | 360.82        | 57.73         | 84.00        | 7200.00        | 363.43        | 361.87        | 17.18        |
|         | 50-15 | 336.24        | 268.93        | 20.02        | 7200.00        | 335.71        | 57.58         | 82.85        | 7200.00        | 336.72        | 336.24        | 20.90        |
|         | 50-16 | 376.66        | 274.74        | 27.06        | 7200.00        | 376.20        | 62.04         | 83.51        | 7200.00        | 377.07        | 376.66        | 20.49        |
|         | 50-17 | 341.17        | 262.71        | 23.00        | 7200.00        | 340.83        | 52.89         | 84.48        | 7200.00        | 341.59        | 341.17        | 19.72        |
|         | 50-18 | 378.85        | 283.73        | 25.11        | 7200.00        | 377.86        | 57.34         | 84.82        | 7200.00        | 379.99        | 378.85        | 18.39        |
|         | 50-19 | 349.91        | 291.07        | 16.82        | 7200.00        | 348.14        | 59.50         | 82.91        | 7200.00        | 353.40        | 349.91        | 17.30        |
|         | 50-20 | 373.07        | 295.56        | 20.78        | 7200.00        | 370.76        | 58.79         | 84.14        | 7200.00        | 375.27        | 373.07        | 19.77        |
|         | 50-21 | 358.91        | 283.19        | 21.10        | 7200.00        | 358.88        | 62.67         | 82.54        | 7200.00        | 360.19        | 358.91        | 20.14        |
|         | 50-22 | 333.02        | 268.32        | 19.43        | 7200.00        | 333.02        | 50.21         | 84.92        | 7200.00        | 333.40        | 333.02        | 18.37        |
|         | 50-23 | 381.84        | 295.50        | 22.61        | 7200.00        | 381.13        | 58.72         | 84.59        | 7200.00        | 383.89        | 381.84        | 19.81        |
|         | 50-24 | 319.60        | 254.52        | 20.36        | 7200.00        | 319.43        | 49.43         | 84.53        | 7200.00        | 320.93        | 319.60        | 16.75        |
|         | 50-25 | 377.48        | 301.93        | 20.01        | 7200.00        | 377.40        | 75.26         | 80.06        | 7200.00        | 380.78        | 377.48        | 23.13        |
|         |       | <b>356.26</b> | <b>280.55</b> | <b>21.20</b> | <b>7200.00</b> | <b>355.33</b> | <b>57.57</b>  | <b>83.82</b> | <b>7200.00</b> | <b>357.66</b> | <b>356.26</b> | <b>19.12</b> |
| Cluster | 50-1  | 301.20        | 215.69        | 28.39        | 7200.00        | 299.64        | 133.09        | 55.58        | 7200.00        | 301.80        | 301.20        | 18.04        |
|         | 50-2  | 290.38        | 204.90        | 29.44        | 7200.00        | 289.77        | 125.63        | 56.64        | 7200.00        | 291.81        | 290.38        | 17.54        |
|         | 50-3  | 295.41        | 210.39        | 28.78        | 7200.00        | 293.45        | 131.70        | 55.12        | 7200.00        | 297.36        | 295.41        | 19.51        |
|         | 50-4  | 281.96        | 196.99        | 30.13        | 7200.00        | 281.80        | 128.89        | 54.26        | 7200.00        | 282.61        | 281.96        | 16.75        |
|         | 50-5  | 298.26        | 202.80        | 32.01        | 7200.00        | 298.06        | 121.14        | 59.36        | 7200.00        | 298.87        | 298.26        | 17.48        |
|         | 50-6  | 303.61        | 210.74        | 30.59        | 7200.00        | 301.81        | 126.29        | 58.16        | 7200.00        | 305.17        | 303.61        | 19.02        |
|         | 50-7  | 294.29        | 201.14        | 31.65        | 7200.00        | 291.28        | 128.80        | 55.78        | 7200.00        | 295.89        | 294.29        | 18.61        |
|         | 50-8  | 304.60        | 213.00        | 30.07        | 7200.00        | 302.37        | 124.64        | 58.78        | 7200.00        | 305.64        | 304.60        | 19.12        |
|         | 50-9  | 287.94        | 203.44        | 29.35        | 7200.00        | 285.42        | 125.98        | 55.86        | 7200.00        | 289.51        | 287.94        | 17.72        |
|         | 50-10 | 291.51        | 207.94        | 28.67        | 7200.00        | 290.01        | 131.75        | 54.57        | 7200.00        | 292.71        | 291.51        | 19.22        |
|         | 50-11 | 285.84        | 188.58        | 34.03        | 7200.00        | 285.17        | 122.90        | 56.90        | 7200.00        | 287.12        | 285.84        | 17.51        |
|         | 50-12 | 302.12        | 220.31        | 27.08        | 7200.00        | 299.48        | 128.67        | 57.03        | 7200.00        | 302.52        | 302.12        | 17.87        |
|         | 50-13 | 296.06        | 208.86        | 29.45        | 7200.00        | 295.58        | 122.80        | 58.45        | 7200.00        | 296.81        | 296.06        | 17.67        |
|         | 50-14 | 293.77        | 197.43        | 32.79        | 7200.00        | 293.62        | 126.16        | 57.03        | 7200.00        | 294.77        | 293.77        | 18.25        |
|         | 50-15 | 294.43        | 212.70        | 27.76        | 7200.00        | 293.26        | 127.40        | 56.56        | 7200.00        | 296.01        | 294.43        | 17.10        |
|         | 50-16 | 285.08        | 206.82        | 27.45        | 7200.00        | 284.91        | 126.60        | 55.56        | 7200.00        | 285.21        | 285.08        | 17.60        |
|         | 50-17 | 291.72        | 196.22        | 32.74        | 7200.00        | 291.35        | 124.86        | 57.14        | 7200.00        | 292.76        | 291.72        | 16.97        |
|         | 50-18 | 295.01        | 201.97        | 31.54        | 7200.00        | 292.24        | 126.56        | 56.69        | 7200.00        | 296.64        | 295.01        | 18.60        |
|         | 50-19 | 282.65        | 195.68        | 30.77        | 7200.00        | 282.47        | 124.88        | 55.79        | 7200.00        | 283.94        | 282.65        | 17.53        |
|         | 50-20 | 293.95        | 209.55        | 28.71        | 7200.00        | 292.52        | 127.95        | 56.26        | 7200.00        | 295.14        | 293.95        | 16.82        |
|         | 50-21 | 290.59        | 208.51        | 28.25        | 7200.00        | 290.59        | 121.05        | 58.34        | 7200.00        | 290.72        | 290.59        | 18.44        |
|         | 50-22 | 290.95        | 196.17        | 32.58        | 7200.00        | 290.14        | 125.44        | 56.77        | 7200.00        | 292.01        | 290.95        | 16.05        |
|         | 50-23 | 284.35        | 204.61        | 28.04        | 7200.00        | 282.04        | 122.05        | 56.73        | 7200.00        | 285.33        | 284.35        | 18.40        |
|         | 50-24 | 301.39        | 213.46        | 29.18        | 7200.00        | 300.59        | 126.99        | 57.75        | 7200.00        | 302.54        | 301.39        | 17.68        |
|         | 50-25 | 294.44        | 213.40        | 27.52        | 7200.00        | 293.22        | 126.03        | 57.02        | 7200.00        | 295.33        | 294.44        | 16.97        |
|         |       | <b>293.26</b> | <b>205.65</b> | <b>29.88</b> | <b>7200.00</b> | <b>292.03</b> | <b>126.33</b> | <b>56.73</b> | <b>7200.00</b> | <b>294.33</b> | <b>293.26</b> | <b>17.86</b> |

**Table 13** Comparison results of Model+, LBB and TSIH for instance set Poi325 with  $n = 100$ 

|         |        | Model+        |               |              |                | LBB           |               |              |                | TSIH          |               |              |
|---------|--------|---------------|---------------|--------------|----------------|---------------|---------------|--------------|----------------|---------------|---------------|--------------|
|         |        | UB            | LB            | gap(%)       | time(s)        | UB            | LB            | gap(%)       | time(s)        | UB            | UB*           | time(s)      |
| Regular | 100-1  | 503.83        | 381.82        | 24.22        | 7200.00        | 503.48        | 45.95         | 90.87        | 7200.00        | 507.78        | 503.83        | 48.21        |
|         | 100-2  | 490.45        | 377.70        | 22.99        | 7200.00        | 488.62        | 41.77         | 91.45        | 7200.00        | 492.26        | 490.45        | 48.34        |
|         | 100-3  | 493.94        | 396.05        | 19.82        | 7200.00        | 492.43        | 38.47         | 92.19        | 7200.00        | 496.92        | 493.94        | 51.68        |
|         | 100-4  | 510.75        | 393.61        | 22.93        | 7200.00        | 510.75        | 42.84         | 91.61        | 7200.00        | 511.80        | 510.75        | 44.22        |
|         | 100-5  | 497.90        | 386.85        | 22.30        | 7200.00        | 497.90        | 40.28         | 91.91        | 7200.00        | 499.33        | 497.90        | 42.22        |
|         | 100-6  | 500.35        | 382.07        | 23.64        | 7200.00        | 500.35        | 42.30         | 91.55        | 7200.00        | 504.02        | 500.35        | 52.91        |
|         | 100-7  | 467.97        | 356.29        | 23.87        | 7200.00        | 466.90        | 35.66         | 92.36        | 7200.00        | 471.91        | 467.97        | 39.73        |
|         | 100-8  | 489.10        | 372.86        | 23.77        | 7200.00        | 489.10        | 42.82         | 91.25        | 7200.00        | 490.37        | 489.10        | 43.91        |
|         | 100-9  | 492.36        | 393.46        | 20.09        | 7200.00        | 492.36        | 41.49         | 91.57        | 7200.00        | 494.66        | 492.36        | 64.66        |
|         | 100-10 | 480.92        | 361.59        | 24.81        | 7200.00        | 480.92        | 37.21         | 92.26        | 7200.00        | 485.06        | 480.92        | 39.95        |
|         | 100-11 | 491.53        | 381.06        | 22.48        | 7200.00        | 491.53        | 40.66         | 91.73        | 7200.00        | 493.27        | 491.53        | 49.15        |
|         | 100-12 | 465.54        | 330.77        | 28.95        | 7200.00        | 465.54        | 32.96         | 92.92        | 7200.00        | 469.56        | 465.54        | 38.78        |
|         | 100-13 | 491.26        | 373.18        | 24.04        | 7200.00        | 491.26        | 40.84         | 91.69        | 7200.00        | 492.60        | 491.26        | 48.89        |
|         | 100-14 | 489.07        | 373.25        | 23.68        | 7200.00        | 489.07        | 38.33         | 92.16        | 7200.00        | 490.94        | 489.07        | 46.17        |
|         | 100-15 | 505.64        | 366.55        | 27.51        | 7200.00        | 505.64        | 36.79         | 92.72        | 7200.00        | 508.95        | 505.64        | 44.45        |
|         | 100-16 | 506.60        | 397.47        | 21.54        | 7200.00        | 506.60        | 42.44         | 91.62        | 7200.00        | 508.44        | 506.60        | 46.42        |
|         | 100-17 | 475.64        | 369.78        | 22.26        | 7200.00        | 475.64        | 37.91         | 92.03        | 7200.00        | 477.14        | 475.64        | 48.31        |
|         | 100-18 | 517.12        | 397.05        | 23.22        | 7200.00        | 517.12        | 38.62         | 92.53        | 7200.00        | 519.58        | 517.12        | 50.44        |
|         | 100-19 | 471.09        | 346.51        | 26.44        | 7200.00        | 471.02        | 34.57         | 92.66        | 7200.00        | 472.04        | 471.09        | 43.32        |
|         | 100-20 | 500.28        | 365.13        | 27.02        | 7200.00        | 499.34        | 43.27         | 91.33        | 7200.00        | 504.14        | 500.28        | 49.73        |
|         | 100-21 | 497.75        | 383.58        | 22.94        | 7200.00        | 497.75        | 43.67         | 91.23        | 7200.00        | 499.74        | 497.75        | 46.50        |
|         | 100-22 | 500.11        | 373.52        | 25.31        | 7200.00        | 499.87        | 39.67         | 92.06        | 7200.00        | 503.51        | 500.11        | 44.90        |
|         | 100-23 | 484.64        | 393.60        | 18.79        | 7200.00        | 484.64        | 38.03         | 92.15        | 7200.00        | 487.38        | 484.64        | 53.12        |
|         | 100-24 | 494.73        | 395.56        | 20.05        | 7200.00        | 494.73        | 37.91         | 92.34        | 7200.00        | 496.18        | 494.73        | 44.34        |
|         | 100-25 | 493.09        | 387.63        | 21.39        | 7200.00        | 492.90        | 41.41         | 91.60        | 7200.00        | 494.27        | 493.09        | 42.82        |
|         |        | <b>492.47</b> | <b>377.48</b> | <b>23.36</b> | <b>7200.00</b> | <b>492.22</b> | <b>39.83</b>  | <b>91.91</b> | <b>7200.00</b> | <b>494.87</b> | <b>492.47</b> | <b>46.93</b> |
| Cluster | 100-1  | 339.74        | 236.49        | 30.39        | 7200.00        | 339.72        | 121.26        | 64.31        | 7200.00        | 340.80        | 339.74        | 46.69        |
|         | 100-2  | 325.12        | 232.91        | 28.36        | 7200.00        | 324.93        | 116.20        | 64.24        | 7200.00        | 325.60        | 325.12        | 45.45        |
|         | 100-3  | 334.83        | 236.76        | 29.29        | 7200.00        | 334.83        | 113.93        | 65.97        | 7200.00        | 335.80        | 334.83        | 48.46        |
|         | 100-4  | 336.11        | 237.92        | 29.21        | 7200.00        | 335.97        | 117.45        | 65.04        | 7200.00        | 337.35        | 336.11        | 53.21        |
|         | 100-5  | 340.13        | 237.45        | 30.19        | 7200.00        | 340.12        | 116.50        | 65.75        | 7200.00        | 342.93        | 340.12        | 51.38        |
|         | 100-6  | 333.07        | 235.16        | 29.40        | 7200.00        | 332.73        | 120.81        | 63.69        | 7200.00        | 333.74        | 333.07        | 40.96        |
|         | 100-7  | 341.09        | 235.72        | 30.89        | 7200.00        | 341.09        | 113.84        | 66.63        | 7200.00        | 341.60        | 341.09        | 41.55        |
|         | 100-8  | 338.55        | 240.65        | 28.92        | 7200.00        | 338.55        | 115.41        | 65.91        | 7200.00        | 339.55        | 338.55        | 45.18        |
|         | 100-9  | 325.67        | 217.56        | 33.20        | 7200.00        | 325.67        | 116.81        | 64.13        | 7200.00        | 325.96        | 325.67        | 48.91        |
|         | 100-10 | 337.60        | 235.28        | 30.31        | 7200.00        | 337.60        | 118.80        | 64.81        | 7200.00        | 339.63        | 337.60        | 45.48        |
|         | 100-11 | 329.03        | 227.93        | 30.73        | 7200.00        | 329.01        | 117.58        | 64.26        | 7200.00        | 330.03        | 329.03        | 46.04        |
|         | 100-12 | 328.70        | 235.35        | 28.40        | 7200.00        | 328.70        | 118.42        | 63.97        | 7200.00        | 331.07        | 328.70        | 42.15        |
|         | 100-13 | 338.39        | 225.14        | 33.47        | 7200.00        | 337.70        | 120.05        | 64.45        | 7200.00        | 340.06        | 338.39        | 46.37        |
|         | 100-14 | 329.22        | 227.50        | 30.90        | 7200.00        | 327.45        | 113.77        | 65.26        | 7200.00        | 331.16        | 329.22        | 41.80        |
|         | 100-15 | 334.16        | 237.00        | 29.08        | 7200.00        | 334.11        | 120.15        | 64.04        | 7200.00        | 335.96        | 334.16        | 42.60        |
|         | 100-16 | 340.59        | 244.26        | 28.28        | 7200.00        | 340.50        | 115.37        | 66.12        | 7200.00        | 341.60        | 340.59        | 40.68        |
|         | 100-17 | 342.85        | 239.36        | 30.19        | 7200.00        | 342.65        | 118.86        | 65.31        | 7200.00        | 346.01        | 342.85        | 44.48        |
|         | 100-18 | 340.37        | 236.05        | 30.65        | 7200.00        | 339.97        | 117.28        | 65.50        | 7200.00        | 341.77        | 340.37        | 44.69        |
|         | 100-19 | 338.70        | 228.80        | 32.45        | 7200.00        | 338.70        | 113.07        | 66.62        | 7200.00        | 339.62        | 338.70        | 43.48        |
|         | 100-20 | 326.02        | 232.72        | 28.62        | 7200.00        | 325.66        | 116.98        | 64.08        | 7200.00        | 326.82        | 326.02        | 42.78        |
|         | 100-21 | 340.68        | 230.30        | 32.40        | 7200.00        | 340.68        | 112.74        | 66.91        | 7200.00        | 341.27        | 340.68        | 44.82        |
|         | 100-22 | 334.32        | 232.87        | 30.34        | 7200.00        | 334.32        | 115.13        | 65.56        | 7200.00        | 337.59        | 334.32        | 45.55        |
|         | 100-23 | 341.07        | 241.07        | 29.32        | 7200.00        | 340.96        | 115.18        | 66.22        | 7200.00        | 343.78        | 341.07        | 42.05        |
|         | 100-24 | 338.34        | 229.93        | 32.04        | 7200.00        | 338.34        | 121.78        | 64.01        | 7200.00        | 340.01        | 338.34        | 45.71        |
|         | 100-25 | 334.92        | 229.78        | 31.39        | 7200.00        | 333.90        | 118.26        | 64.58        | 7200.00        | 335.65        | 334.92        | 38.95        |
|         |        | <b>335.57</b> | <b>233.76</b> | <b>30.34</b> | <b>7200.00</b> | <b>335.35</b> | <b>117.02</b> | <b>65.09</b> | <b>7200.00</b> | <b>337.01</b> | <b>335.57</b> | <b>44.78</b> |

**Table 14** Comparison results of Model+, LBBD and TSIH for instance set Poi325 with  $n = 200$ 

|         |        | Model+ |    |        |         | LBBD          |              |              |                | TSIH          |               |               |
|---------|--------|--------|----|--------|---------|---------------|--------------|--------------|----------------|---------------|---------------|---------------|
|         |        | UB     | LB | gap(%) | time(s) | UB            | LB           | gap(%)       | time(s)        | UB            | UB*           | time(s)       |
| Regular | 200-1  | —      | —  | —      | —       | 691.91        | 29.51        | 95.74        | 7200.00        | 694.14        | 691.91        | 173.72        |
|         | 200-2  | —      | —  | —      | —       | 685.16        | 29.39        | 95.71        | 7200.00        | 687.29        | 685.16        | 161.22        |
|         | 200-3  | —      | —  | —      | —       | 688.96        | 30.80        | 95.53        | 7200.00        | 691.46        | 688.96        | 132.73        |
|         | 200-4  | —      | —  | —      | —       | 679.96        | 29.15        | 95.71        | 7200.00        | 680.84        | 679.96        | 162.43        |
|         | 200-5  | —      | —  | —      | —       | 664.04        | 32.42        | 95.12        | 7200.00        | 665.96        | 664.04        | 135.39        |
|         | 200-6  | —      | —  | —      | —       | 686.53        | 30.14        | 95.61        | 7200.00        | 690.59        | 686.53        | 168.86        |
|         | 200-7  | —      | —  | —      | —       | 679.16        | 28.11        | 95.86        | 7200.00        | 681.64        | 679.16        | 162.69        |
|         | 200-8  | —      | —  | —      | —       | 661.53        | 31.52        | 95.24        | 7200.00        | 666.03        | 661.53        | 155.19        |
|         | 200-9  | —      | —  | —      | —       | 676.24        | 30.68        | 95.46        | 7200.00        | 682.00        | 676.24        | 190.48        |
|         | 200-10 | —      | —  | —      | —       | 660.01        | 31.27        | 95.26        | 7200.00        | 663.33        | 660.01        | 133.43        |
|         | 200-11 | —      | —  | —      | —       | 668.26        | 30.88        | 95.38        | 7200.00        | 671.63        | 668.26        | 156.48        |
|         | 200-12 | —      | —  | —      | —       | 664.97        | 30.58        | 95.40        | 7200.00        | 670.77        | 664.97        | 181.43        |
|         | 200-13 | —      | —  | —      | —       | 678.70        | 31.07        | 95.42        | 7200.00        | 683.88        | 678.70        | 166.16        |
|         | 200-14 | —      | —  | —      | —       | 685.51        | 29.13        | 95.75        | 7200.00        | 688.70        | 685.51        | 190.64        |
|         | 200-15 | —      | —  | —      | —       | 687.41        | 31.84        | 95.37        | 7200.00        | 692.10        | 687.41        | 156.82        |
|         | 200-16 | —      | —  | —      | —       | 668.86        | 32.35        | 95.16        | 7200.00        | 672.36        | 668.86        | 176.45        |
|         | 200-17 | —      | —  | —      | —       | 667.86        | 28.99        | 95.66        | 7200.00        | 671.10        | 667.86        | 189.97        |
|         | 200-18 | —      | —  | —      | —       | 679.26        | 31.33        | 95.39        | 7200.00        | 683.14        | 679.26        | 171.49        |
|         | 200-19 | —      | —  | —      | —       | 696.99        | 32.55        | 95.33        | 7200.00        | 698.01        | 696.99        | 139.30        |
|         | 200-20 | —      | —  | —      | —       | 675.16        | 28.62        | 95.76        | 7200.00        | 677.19        | 675.16        | 145.80        |
|         | 200-21 | —      | —  | —      | —       | 673.79        | 30.59        | 95.46        | 7200.00        | 677.59        | 673.79        | 174.46        |
|         | 200-22 | —      | —  | —      | —       | 685.29        | 32.33        | 95.28        | 7200.00        | 687.78        | 685.29        | 172.11        |
|         | 200-23 | —      | —  | —      | —       | 660.14        | 29.65        | 95.51        | 7200.00        | 663.31        | 660.42        | 167.79        |
|         | 200-24 | —      | —  | —      | —       | 693.73        | 31.37        | 95.48        | 7200.00        | 694.91        | 693.73        | 162.27        |
|         | 200-25 | —      | —  | —      | —       | 697.55        | 32.65        | 95.32        | 7200.00        | 699.86        | 697.55        | 172.51        |
|         |        |        |    |        |         | <b>678.28</b> | <b>30.68</b> | <b>95.48</b> | <b>7200.00</b> | <b>681.42</b> | <b>678.29</b> | <b>163.99</b> |
